# Supplementary material for: Multicentric randomised study of Helicobacter pylori eradication and pepsinogen testing for prevention of gastric cancer mortality: the GISTAR study
Source: PubMed Central journal article supplement — BMJ Open. 2017 Aug 11;7(8):e016999. doi: 10.1136/bmjopen-2017-016999 (PMC5724070; doi:10.1136/bmjopen-2017-016999), 2017-08-11
Supplement: bmjopen-2017-016999.draft_revisions.pdf [file bmjopen-2017-016999.draft_revisions.pdf]

# BMJ Open

BMJ Open is committed to open peer review. As part of this commitment we make the peer review history of every article we publish publicly available.

When an article is published we post the peer reviewers' comments and the authors' responses online. We also post the versions of the paper that were used during peer review. These are the versions that the peer review comments apply to.

The versions of the paper that follow are the versions that were submitted during the peer review process. They are not the versions of record or the final published versions. They should not be cited or distributed as the published version of this manuscript.

BMJ Open is an open access journal and the full, final, typeset and author-corrected version of record of the manuscript is available on our site with no access controls, subscription charges or pay-per-view fees (<http://bmjopen.bmj.com>).

If you have any questions on BMJ Open's open peer review process please email [editorial.bmjopen@bmj.com](mailto:editorial.bmjopen@bmj.com)

# BMJ Open

## Multicentric randomized study of *H. pylori* eradication and pepsinogen testing for prevention of gastric cancer mortality: the GISTAR study

|                                 |                                                                                                                                                                                                                                                                                                                                                                                                                                                                                                                                                                                                                                                                                                                                                                                                                                                                                                                                                                                                                                                                                                                                                                                                                                                                                                                                                                                                                                                                                                                                                                                                                                                                                                                                                                                                                                                                                                                                                                                           |
|---------------------------------|-------------------------------------------------------------------------------------------------------------------------------------------------------------------------------------------------------------------------------------------------------------------------------------------------------------------------------------------------------------------------------------------------------------------------------------------------------------------------------------------------------------------------------------------------------------------------------------------------------------------------------------------------------------------------------------------------------------------------------------------------------------------------------------------------------------------------------------------------------------------------------------------------------------------------------------------------------------------------------------------------------------------------------------------------------------------------------------------------------------------------------------------------------------------------------------------------------------------------------------------------------------------------------------------------------------------------------------------------------------------------------------------------------------------------------------------------------------------------------------------------------------------------------------------------------------------------------------------------------------------------------------------------------------------------------------------------------------------------------------------------------------------------------------------------------------------------------------------------------------------------------------------------------------------------------------------------------------------------------------------|
| Journal:                        | <i>BMJ Open</i>                                                                                                                                                                                                                                                                                                                                                                                                                                                                                                                                                                                                                                                                                                                                                                                                                                                                                                                                                                                                                                                                                                                                                                                                                                                                                                                                                                                                                                                                                                                                                                                                                                                                                                                                                                                                                                                                                                                                                                           |
| Manuscript ID                   | bmjopen-2017-016999                                                                                                                                                                                                                                                                                                                                                                                                                                                                                                                                                                                                                                                                                                                                                                                                                                                                                                                                                                                                                                                                                                                                                                                                                                                                                                                                                                                                                                                                                                                                                                                                                                                                                                                                                                                                                                                                                                                                                                       |
| Article Type:                   | Protocol                                                                                                                                                                                                                                                                                                                                                                                                                                                                                                                                                                                                                                                                                                                                                                                                                                                                                                                                                                                                                                                                                                                                                                                                                                                                                                                                                                                                                                                                                                                                                                                                                                                                                                                                                                                                                                                                                                                                                                                  |
| Date Submitted by the Author:   | 31-Mar-2017                                                                                                                                                                                                                                                                                                                                                                                                                                                                                                                                                                                                                                                                                                                                                                                                                                                                                                                                                                                                                                                                                                                                                                                                                                                                                                                                                                                                                                                                                                                                                                                                                                                                                                                                                                                                                                                                                                                                                                               |
| Complete List of Authors:       | <p>Leja, Marcis; Latvijas Universitate, Institute of Clinical and Preventive Medicine<br/> Park, Jin Young; International Agency for Research on Cancer, Prevention and Implementation Group<br/> Murillo, Raul; International Agency for Research on Cancer, Prevention and Implementation Group<br/> Liepniece-Karele, Inta; Latvijas Universitate, Institute of Clinical and Preventive Medicine ; Rigas Austrumu kliniska universitates slimnica, Department of Research<br/> Isajevs, Sergejs; Latvijas Universitate, Institute of Clinical and Preventive Medicine; Rigas Austrumu kliniska universitates slimnica, Department of Research<br/> Kikuste, Ilze; Latvijas Universitate, Institute of Clinical and Preventive Medicine; Digestive Diseases Centre GASTRO<br/> Rudzite, Dace; Latvijas Universitate, Institute of Clinical and Preventive Medicine ; Rigas Austrumu kliniska universitates slimnica, Department of Research<br/> Krike, Petra; Latvijas Universitate, Institute of Clinical and Preventive Medicine<br/> Parshutin, Sergei; Latvijas Universitate, Institute of Clinical and Preventive Medicine ; Rigas Tehniska universitate, Institute of Information Technology<br/> Polaka, Inese; Latvijas Universitate, Institute of Clinical and Preventive Medicine; Rigas Tehniska universitate, Institute of Information Technology<br/> Kirsners, Arnis; Latvijas Universitate, Institute of Clinical and Preventive Medicine; Rigas Tehniska universitate, Institute of Information Technology<br/> Santare, Daiga; Latvijas Universitate, Institute of Clinical and Preventive Medicine; Rigas Austrumu kliniska universitates slimnica, Department of Research<br/> Folkmanis, Valdis; Latvijas Universitate, Faculty of Medicine<br/> Daugule, Ilva; Latvijas Universitate, Institute of Clinical and Preventive Medicine<br/> Plummer, Martyn; International Agency for Research on Cancer, Herrero, Rolando; IARC, Early Detection and Prevention</p> |
| <b>Primary Subject Heading</b>: | Public health                                                                                                                                                                                                                                                                                                                                                                                                                                                                                                                                                                                                                                                                                                                                                                                                                                                                                                                                                                                                                                                                                                                                                                                                                                                                                                                                                                                                                                                                                                                                                                                                                                                                                                                                                                                                                                                                                                                                                                             |
| Secondary Subject Heading:      | Gastroenterology and hepatology, Oncology, Epidemiology                                                                                                                                                                                                                                                                                                                                                                                                                                                                                                                                                                                                                                                                                                                                                                                                                                                                                                                                                                                                                                                                                                                                                                                                                                                                                                                                                                                                                                                                                                                                                                                                                                                                                                                                                                                                                                                                                                                                   |
| Keywords:                       | Gastric cancer, prevention, <i>H. pylori</i> , eradication, pepsinogen, randomised                                                                                                                                                                                                                                                                                                                                                                                                                                                                                                                                                                                                                                                                                                                                                                                                                                                                                                                                                                                                                                                                                                                                                                                                                                                                                                                                                                                                                                                                                                                                                                                                                                                                                                                                                                                                                                                                                                        |

1  
2  
3  
4  
5  
6  
7  
8  
9  
10  
11  
12  
13  
14  
15  
16  
17  
18  
19  
20  
21  
22  
23  
24  
25  
26  
27  
28  
29  
30  
31  
32  
33  
34  
35  
36  
37  
38  
39  
40  
41  
42  
43  
44  
45  
46  
47  
48  
49  
50  
51  
52  
53  
54  
55  
56  
57  
58  
59  
60

|  |       |
|--|-------|
|  | study |
|  |       |

SCHOLARONE™  
Manuscripts

For peer review only

1  
2  
3  
4  
5  
6  
7  
8  
9  
10  
11  
12  
13  
14  
15  
16  
17  
18  
19  
20  
21  
22  
23  
24  
25  
26  
27  
28  
29  
30  
31  
32  
33  
34  
35  
36  
37  
38  
39  
40  
41  
42  
43  
44  
45  
46  
47  
48  
49  
50  
51  
52  
53  
54  
55  
56  
57  
58  
59  
60

Title page

## Multicentric randomized study of *H. pylori* eradication and pepsinogen testing for prevention of gastric cancer mortality: the GISTAR study

Marcis Leja<sup>1,3</sup>, Jin Young Park<sup>4</sup>, Raul Murillo<sup>4</sup>, Inta Liepniece-Karele<sup>1,2,5</sup>, Sergejs Isajevs<sup>1,2,5</sup>, Ilze Kikuste<sup>1,3</sup>, Dace Rudzite<sup>1,2</sup>, Petra Krike<sup>1</sup>, Sergei Parshutin<sup>1,6</sup>, Inese Polaka<sup>1,6</sup>, Arnis Kirsners<sup>1,6</sup>, Daiga Santare<sup>1,2</sup>, Valdis Folkmanis<sup>1</sup>, Ilva Daugule<sup>1</sup>, Martyn Plummer<sup>7</sup>, Rolando Herrero<sup>4</sup>

- 1- Institute of Clinical and Preventive Medicine & Faculty of Medicine, University of Latvia, Riga, Latvia
- 2- Department of Research, Riga East University hospital, Riga, Latvia
- 3- Digestive Diseases Centre GASTRO, Riga, Latvia
- 4- Prevention and Implementation Group, International Agency for Research on Cancer, Lyon, France
- 5- Academic Histology Laboratory, Riga, Latvia
- 6- Institute of Information Technology, Riga Technical University, Riga, Latvia
- 7- Infection and Cancer Epidemiology Group, International Agency for Research on Cancer, Lyon, France

Contact details of the authors:

**Marcis Leja**, Institute of Clinical and Preventive Medicine & Faculty of Medicine, University of Latvia; Address: 19 Raina boulv., LV1586 Riga, Latvia; e-mail: [cei@latnet.lv](mailto:cei@latnet.lv)

**Jin Young Park**, Prevention and Implementation Group, International Agency for Research on Cancer, Address: 150 Cours Albert Thomas, 69372 Lyon Cedex 08, France; e-mail: [ParkJY@iarc.fr](mailto:ParkJY@iarc.fr)

**Raul Murillo**, Prevention and Implementation Group, International Agency for Research on Cancer, Address: 150 Cours Albert Thomas, 69372 Lyon Cedex 08, France; e-mail: [MurilloR@iarc.fr](mailto:MurilloR@iarc.fr)

**Inta Liepniece-Karele**, Institute of Clinical and Preventive Medicine & Faculty of Medicine, University of Latvia; Address: 19 Raina boulv., LV1586 Riga, Latvia; e-mail: [intaliepniecekarele@inbox.lv](mailto:intaliepniecekarele@inbox.lv)

**Sergejs Isajevs**, Institute of Clinical and Preventive Medicine & Faculty of Medicine, University of Latvia; Address: 19 Raina boulv., LV1586 Riga, Latvia; e-mail: [sergisajevs@inbox.lv](mailto:sergisajevs@inbox.lv)

**Ilze Kikuste**, Institute of Clinical and Preventive Medicine & Faculty of Medicine, University of Latvia; Address: 19 Raina boulv., LV1586 Riga, Latvia; e-mail: [ikikuste@gmail.com](mailto:ikikuste@gmail.com)

1  
2  
3 **Dace Rudzite**, Institute of Clinical and Preventive Medicine & Faculty of Medicine, University  
4 of Latvia; Address: 19 Raina boulv., LV1586 Riga, Latvia; e-mail: [dacerudzite2008@inbox.lv](mailto:dacerudzite2008@inbox.lv)  
5

6 **Petra Krike**, Institute of Clinical and Preventive Medicine & Faculty of Medicine, University of  
7 Latvia; Address: 19 Raina boulv., LV1586 Riga, Latvia; e-mail: [petra.krike@gmail.com](mailto:petra.krike@gmail.com)  
8

9 **Sergei Parshutin**, Institute of Clinical and Preventive Medicine & Faculty of Medicine,  
10 University of Latvia; Address: 19 Raina boulv., LV1586 Riga, Latvia; e-mail:  
11 [Sergejs.Parsutins@rtu.lv](mailto:Sergejs.Parsutins@rtu.lv)  
12

13 **Inese Polaka**, Institute of Clinical and Preventive Medicine & Faculty of Medicine, University  
14 of Latvia; Address: 19 Raina boulv., LV1586 Riga, Latvia; e-mail: [inese.polaka@gmail.com](mailto:inese.polaka@gmail.com)  
15

16 **Arnis Kirsners**, Institute of Clinical and Preventive Medicine & Faculty of Medicine,  
17 University of Latvia; Address: 19 Raina boulv., LV1586 Riga, Latvia; e-mail:  
18 [arnis.kirsners@rtu.lv](mailto:arnis.kirsners@rtu.lv)  
19

20 **Daiga Santare**, Institute of Clinical and Preventive Medicine & Faculty of Medicine,  
21 University of Latvia; Address: 19 Raina boulv., LV1586 Riga, Latvia; e-mail:  
22 [daiga.santare@inbox.lv](mailto:daiga.santare@inbox.lv)  
23

24 **Valdis Folkmanis**, Institute of Clinical and Preventive Medicine & Faculty of Medicine,  
25 University of Latvia; Address: 19 Raina boulv., LV1586 Riga, Latvia; e-mail:  
26 [valdis.folkmanis@lu.lv](mailto:valdis.folkmanis@lu.lv)  
27

28 **Ilva Daugule**, Institute of Clinical and Preventive Medicine & Faculty of Medicine, University  
29 of Latvia; Address: 19 Raina boulv., LV1586 Riga, Latvia; e-mail: [ilva\\_daugule@hotmail.com](mailto:ilva_daugule@hotmail.com)  
30

31 **Martyn Plummer**, Infection and Cancer Epidemiology Group, International Agency for  
32 Research on Cancer, Address: 150 Cours Albert Thomas, 69372 Lyon Cedex 08, France; e-  
33 mail: [plummerm@iarc.fr](mailto:plummerm@iarc.fr)  
34

35 **Rolando Herrero**, Prevention and Implementation Group, International Agency for Research  
36 on Cancer, Address: 150 Cours Albert Thomas, 69372 Lyon Cedex 08, France; e-mail:  
37 [HerreroR@iarc.fr](mailto:HerreroR@iarc.fr)  
38

39  
40  
41  
42 Corresponding author:  
43

44 **Prof. Marcis Leja**: Institute of Clinical and Preventive Medicine & Faculty of Medicine,  
45 University of Latvia, Riga, Latvia; Address: 19 Raina boulv., Riga LV1586; Tel.: +371-  
46  
47 29497500; Fax: +371-67040248, E-mail: [cei@latnet.lv](mailto:cei@latnet.lv)  
48  
49  
50  
51  
52  
53  
54  
55  
56  
57  
58  
59  
60

**Abstract**

**Introduction:** Population-based eradication of *H. pylori* has been suggested to be cost-effective and is recommended by international guidelines. However, the potential adverse effects of widespread antibiotic use this would entail have not been sufficiently studied. An alternative way to decrease gastric cancer mortality is by non-invasive search for precancerous lesions, in particular gastric atrophy; pepsinogen tests are the best currently available alternative.

**Methods and analysis:** The primary objective of GISTAR is to determine whether *H. pylori* eradication combined with non-invasive screening of precancerous lesions by pepsinogen tests reduces mortality from gastric cancer among 40-64 year old individuals. The secondary objectives include evaluation of *H. pylori* eradication effectiveness in gastric cancer prevention in patients already carrying precancerous lesions and evaluation of the potential adverse events (including effects on microbiome).

Individuals are recruited from general population (50% men), and undergo detailed lifestyle and medical history questionnaire before being randomly allocated to intervention or control groups. The intervention group undergoes *H. pylori* testing, and is offered eradication therapy if positive; in addition, pepsinogen levels are detected in plasma, and those with decreased levels are referred for upper endoscopy. Effectiveness of eradication and the spectrum of adverse events are evaluated in study subpopulations. A 35% difference in gastric cancer mortality between the groups is expected to be detectable at 90% power after 15 years if 30,000 individuals are recruited. Biological materials (e.g. serum, plasma, DNA, breath sample, material for microbiota analysis) are biobanked for the main and ancillary studies. The study procedure and assumptions will be tested during the pilot phase.

**Ethics and dissemination:** The study was approved by the Ethics Committees of the involved institutions. An independent Data Safety and Monitoring Board has been established. The findings will be published in peer-reviewed journals and presented at scientific meetings.

**Trial registration number:** NCT02047994

**Strengths and limitations of this study**

- This is currently the only study in Europe addressing population-based eradication of *H. pylori* to prevent gastric cancer as recommended by international guidelines (Maastricht V, Kyoto Global Consensus, EU Joint Action Cancer prevention project CanCon)
- Gastric cancer mortality is used as an end-point which corresponds to the requirements of a cancer screening program
- The strategy of combining population-based *H. pylori* eradication to pepsinogen detection with endoscopic surveillance of participants in whom precancerous lesions have been detected, has not been evaluated before
- The study biorepository with a wide range of biospecimen collection will be a great resource to conduct a number of unique ancillary studies
- However, the large sample size with a long follow-up required to demonstrate a statistical difference in mortality reduction between the two groups is a challenge to the study, with the possibility to increase the sample size even further in case of lower prevalence of *H. pylori* infection, higher number of women in the study group and/or lower acceptance rate for the intervention

**Keywords**

Gastric cancer, prevention, *H. pylori*, eradication, pepsinogen, randomised study

## Introduction

Although gastric cancer remains a major cause of death among malignant diseases, its prevention has been neglected in the Western world for decades.<sup>1</sup> Most countries show declining gastric cancer incidence trends, but the total number of cases is not expected to decrease in the next decades due to demographic changes.<sup>2</sup>

There are considerable geographical variations in the incidence of gastric cancer, with some of the lowest rates seen in North America and Western Europe and the highest in Eastern Asia, Eastern Europe, and South America.<sup>3</sup> According to recent estimates from Europe, high rates have been observed in Central and Eastern European regions including Belarus, Ukraine and the Russian Federation and the Baltic States in the Northern Europe, including Latvia. For example, gastric cancer incidence rates are the highest in Belarus (age-standardised rate (ASR) of 42.1/100,000 in men and 17.2/100,000 in women) among 40 European countries.<sup>4,5</sup> These estimates are over three-fold higher than those in France or Switzerland.<sup>4,5</sup> The rates in the majority of the former Soviet Union regions remain high.

Infection with *Helicobacter pylori* (*H. pylori*) is the major etiologic factor responsible for developing gastric cancer.<sup>6,7</sup> It is estimated that 89% of non-cardia gastric cancers are attributable to this infection.<sup>8</sup>

Searching for and eradicating *H. pylori* in healthy asymptomatic adults (the “*search-and-treat*” strategy) has been suggested to be cost-effective by considering the reduction of gastric cancer burden as well as other diseases related to this microorganism.<sup>9-11</sup> The recent global Kyoto conference<sup>12</sup> encouraged the broad application of *search-and-treat*, particularly in high-risk areas. This has been further endorsed by the Maastricht European consensus group.<sup>13</sup> However, due to the limited data available on target groups, feasibility and population impact of the intervention, a working group convened by the International Agency for Research on Cancer (IARC) in 2013 proposed implementation of the strategy via well-designed implementation studies.<sup>1</sup>

*H. pylori* eradication in the general population would lead to high antibiotic consumption, particularly in areas of high prevalence of the infection. Widespread use of the same antibiotics used to treat common diseases, some of them life-threatening, may lead to increased antibiotic resistance of microorganisms other than *H. pylori*.<sup>14</sup> An inverse association observed between the occurrence of gastric and oesophageal cancers may suggest potential opposing effects of the related environmental factors, including *H. pylori*.<sup>15</sup>



1  
2  
3 The potential risks of these effects in community settings were not considered in the above  
4 mentioned cost-effectiveness analyses<sup>9-11</sup>, and knowledge about the potential adverse  
5 effects of *H. pylori* eradication on the gut microbiome is scant.  
6  
7

8  
9 Therefore, the recently published European Guide on Quality Improvement in  
10 Comprehensive Cancer Control emphasised the need for additional clinical studies to clarify  
11 whether and how to implement population-based *H. pylori* screening and eradication  
12 programmes for gastric cancer prevention.<sup>16</sup>  
13  
14

15  
16 In addition to the population-based eradication of *H. pylori*, detection and treatment of  
17 precancerous lesions or early gastric cancer have been proposed as a means to reduce  
18 gastric cancer mortality and some countries in the Western Pacific region have introduced  
19 nationwide gastric cancer screening programmes.<sup>17</sup>20 available non-invasive option to identify individuals with precancerous lesions (in particular,  
21 gastric atrophy)<sup>13</sup> who are at increased risk of gastric cancer. However, a recent meta-  
22 analysis<sup>18</sup> concluded that pepsinogens exhibit only a moderate diagnostic yield in gastric  
23 cancer detection; thus large-scale and well-designed prospective studies are encouraged,  
24 particularly in East, Central and part of Northern Europe and Latin American countries where  
25 gastric cancer burden is relatively high and prevention effort is scarce.  
26  
27  
28  
29  
30  
31

32 Here, we present the design of a clinical trial aimed at investigating the role of *H. pylori*  
33 eradication combined with non-invasive screening for precancerous lesions in the reduction  
34 of gastric cancer mortality in a predominantly Caucasian population in Northern and Eastern  
35 Europe (GISTAR).  
36  
37  
38  
39  
40  
41

#### 42 **Methods and analysis**

43 The **aim** of the study is to search for new intervention strategies to decrease mortality from  
44 gastric cancer in high-risk areas in the Baltic States and Eastern Europe. The main study site  
45 is Latvia, where the estimated ASR (world) per 100,000 for gastric cancer mortality was 16.2  
46 in men and 6.4 in women in 2011. Other potential sites include the Russian Federation with  
47 gastric cancer mortality of 20.8 in men and 8.5 in women, Belarus with 20.2 in men and 7.8  
48 in women, and Ukraine with 17.4 in men and 6.6 in women in 2011.<sup>19</sup>  
49  
50  
51  
52

53 The **primary objective** is to determine if *H. pylori* eradication combined with non-invasive  
54 screening and follow-up of precancerous lesions (atrophic gastritis or higher) reduces  
55 mortality from gastric cancer in a high risk population among 40-64 years old subjects.  
56  
57  
58  
59  
60

1  
2  
3 In addition to the above, **secondary objectives** include analyses of success-rates of *H. pylori*  
4 eradication therapy, resistance rates of *H. pylori* to the key antibiotics used in standard  
5 therapies (in subgroups), potential adverse effects of population-based eradication  
6 (including effects on gut microbiome), optimisation of follow-up strategies as well as search  
7 for new biomarkers, including volatile markers.  
8  
9

10  
11 The **key hypotheses** of the study are: 1) *H. pylori* eradication in middle aged individuals in a  
12 high risk population with endoscopic follow-up of those with evidence of atrophic gastritis  
13 prevents gastric cancer mortality; 2) *H. pylori* eradication is effective in preventing gastric  
14 cancer mortality even after the development of gastric mucosal atrophy; 3) Certain  
15 population subgroups can derive more benefit from *H. pylori* eradication, and therefore  
16 could be targeted if general population eradication is not feasible; 4) A combination of  
17 biomarker screening and upper endoscopy is an appropriate strategy to prevent mortality  
18 from gastric cancer in high incidence areas.  
19  
20

21 The study protocol (version 4.5, revised on 07 September, 2015) was approved by the Ethics  
22 Committee of the International Agency for Research on Cancer (IEC 12-36) as well as the  
23 national Ethics Committees in Latvia; the Ethics Committee of Riga East University Support  
24 Foundation (No.14-A/13) and the Central Medical Ethics Committee (No. 01-29.1/11). The  
25 protocol is registered in the clinicaltrials.gov database (NCT02047994). It needs to be noted  
26 that the study initiation date recorded on the Clinical Trials Registry reflects the  
27 commencement of the pilot phase of the study which was conducted between October 2013  
28 and December 2015 while the main GISTAR trial that we present here was initiated on 13  
29 March 2016.  
30  
31  
32  
33  
34  
35  
36  
37  
38  
39

#### 40 41 42 Participants

43 The study aims to enrol men and women at equal proportions at the risk- age (40-64 years at  
44 inclusion) for developing gastric cancer. The recruitment centres are planned in high gastric  
45 cancer risk areas, and predominantly Caucasian origin populations in Europe will be enrolled.  
46 The initial enrolment is planned in Latvia (Caucasian population); more genetically diverse  
47 populations would be enrolled when the study is expanded to other sites.  
48  
49  
50  
51  
52

53 All participants must sign an informed consent and they should be in good health at  
54 enrolment, as determined by medical history and physical examination performed by a  
55 study physician.  
56  
57  
58  
59  
60

1  
2  
3 Individuals will be excluded from the trial if they have any of the following: personal history  
4 of gastric cancer prior to enrolment; gastric resections due to benign disease (participants  
5 with ulcer suturing and vagotomy are eligible); *H. pylori* eradication therapy within 12  
6 months prior to inclusion (irrespective of the treatment result); presence of alarm symptoms  
7 for digestive or any other diseases; pathological findings at physical investigation suggestive  
8 of a serious disease requiring immediate management; factors otherwise limiting the  
9 participation according to the protocol; serious psychological conditions/psychiatric disease  
10 limiting the possibilities to understand the requirements for diagnostic and/or medical  
11 interventions; or low expectations on the compliance for the diagnostic work-up, treatment  
12 or follow-up.  
13  
14  
15  
16  
17  
18  
19  
20  
21

### 22 Interventions

23  
24 The general study design is illustrated in Figure 1.

25  
26 After being provided detailed information on the study by the study personnel and signing a  
27 consent form, individuals with alarm and exclusion symptoms will be identified by a study  
28 physician. The remaining participants will complete a detailed lifestyle and medical history  
29 questionnaire and then will be randomised online into two groups (50% in the intervention  
30 group, 50% in the control group) via central data management system. Randomisation will  
31 be stratified by gender, age group and recruitment site.  
32  
33  
34  
35

36 The intervention group will be tested for pepsinogens (Pg) I and II (Eiken Chemical Co.,  
37 Tokyo, Japan) and for *H. pylori* infection which will be detected by IgG group antibodies by  
38 ELISA (Biohit, Plc., Finland), or alternative methods including <sup>13</sup>C-urea breath test (UBT). The  
39 choice of the methods will be decided based on the results of the pilot study (see below).  
40 For participants undergoing endoscopy, histological confirmation will be required for *H.*  
41 *pylori* positivity.  
42  
43  
44  
45

46 Those with pepsinogen Pgl/PgII≤2 and Pgl≤30 ng/ml will be referred for upper endoscopy  
47 with a detailed biopsy work-up according to the updated Sydney system.<sup>20</sup>  
48  
49

50 All *H. pylori* positive participants will be re-invited and offered *H. pylori* eradication  
51 treatment. The treatment will be chosen according to the Maastricht guidelines,<sup>13</sup> based on  
52 the resistance patterns to clarithromycin in the particular recruitment site as well as the  
53 clinical effectiveness of the particular regimen whenever data are available. In low resistance  
54 areas (<15-20%) including Latvia, the first choice of eradication treatment will be standard  
55  
56  
57  
58  
59  
60

1  
2  
3 triple therapy for 10 days: esomeprazole 40 mg, clarithromycin 500 mg, amoxicillin 1000 mg,  
4 each administered twice a day. Second-line treatment will not be offered within the study;  
5 however, study participants requiring it will be referred to their general practitioners with  
6 relevant recommendations. All individuals diagnosed with precancerous lesions during  
7 upper endoscopy will be followed up according to the Management of precancerous  
8 conditions and lesions in the stomach (MAPS) guidelines.<sup>21</sup>  
9  
10  
11  
12

13 The control group will receive standard care and will not be systematically investigated for  
14 *H. pylori* or precancerous lesions. As an incentive for participation, both groups will be  
15 offered faecal occult blood testing by a laboratory-based immunochemical test (FIT) OC-  
16 Sensor (Eiken Chemical Co., Tokyo, Japan), and whenever positive, referred for colonoscopy.  
17 Biological materials (e.g. serum, plasma, DNA, breath sample, materials for microbiota  
18 analysis) will be collected for biobanking; the materials will provide the unique opportunity  
19 to perform ancillary studies including, but not limited to the following: searching for new  
20 biomarkers; and analysing the impact of wide antibiotic use and presence of precancerous  
21 lesions on gut microbiome.  
22  
23  
24  
25  
26  
27

28 The effectiveness of *H. pylori* eradication will be verified in a subgroup of participants by  
29 using UBT 6-24 months after the treatment. The treatment adherence as well as presence or  
30 absence, frequency and severity of adverse events potentially related to the eradication  
31 therapy will be actively assessed by telephone interview 45-60 days following the delivery of  
32 drugs, and adverse events will be recorded throughout the study. The susceptibility of *H.*  
33 *pylori* to commonly used antibiotics in the eradication therapies will be investigated in  
34 approximately 200 referrals for upper endoscopy with evidence of *H. pylori* in antral  
35 biopsies.  
36  
37  
38  
39  
40  
41

42 The groups will be followed at 5-year intervals by direct or telephone contact or alternative  
43 means of communication until the study end-points are reached. A record linkage will also  
44 be made to the national Cancer and Mortality Registry database to ascertain cases of and  
45 deaths from gastric cancer.  
46  
47  
48

#### 49 Data-capture system and centralized biorepository

50 A centralised multiple-language web-based electronic data-capture system and data  
51 management facilities have been developed for the study. The questionnaire and  
52 investigation data are recorded in a standardised way and the system provides the primary  
53 data source. The system is built using the DotNetNuke content management platform  
54 providing the required conditions for personalized data security. The collected data are  
55  
56  
57  
58  
59  
60

1  
2  
3 stored in a MicroSoft SQL Server database. Initially three languages are being used: English,  
4 Latvian, and Russian. The publicly available information can be viewed at  
5 <https://www.gistar.eu>.  
6  
7

8 A centralized biorepository will be run by the University of Latvia and supervised by IARC.  
9 Pathology services and archiving of formalin- fixed and paraffin-embedded (FFPA) material  
10 will be handled by the Academic Histology Laboratory in Riga, Latvia.  
11

#### 12 Trial endpoints and statistical analyses

13  
14 The primary end-point of the study is mortality difference from gastric cancer between the  
15 intervention and control groups at 15 years or when enough cases accumulate to  
16 demonstrate a statistically significant difference between the groups. Secondary end-points  
17 are the difference in gastric cancer incidence, and all-cause mortality between the two  
18 groups. The proportion of gastric cancer cases arising in the subgroup with biomarkers  
19 indicating high risk (e.g. low Pgl/PgII ratio and low Pgl levels) will be compared to the group  
20 with normal biomarkers at inclusion. Additional estimates will be made on the incidence and  
21 stages of cancers comparing participants under endoscopic surveillance and without it as  
22 well as comparing participants having undergone *H. pylori* eradication versus those having  
23 refused.  
24  
25

26  
27 The sample size of the study is estimated based on the primary variable of interest, gastric  
28 cancer mortality. Estimates of the age- and sex-specific mortality rates from gastric cancer  
29 were taken from the GLOBOCAN 2008 estimates for Belarus.<sup>22</sup> Estimates of the number of  
30 deaths from gastric cancer were calculated for 5, 10, 15, and 20 years of follow-up.  
31 Censoring due to mortality from other causes was taken into account using mortality rates  
32 available on the WHO mortality database for Belarus in the years 2007-2009.<sup>19</sup> In addition, a  
33 loss to follow-up of 1% per year was included in the calculations to account for migration  
34 and other reasons not related to mortality that may prevent the assessment of the primary  
35 outcome.  
36  
37

38  
39 Based on a significance level of 5% and a target power of 90%, with given number of 30,000  
40 participants, 112 deaths from gastric cancer are expected in the control group, and a 35%  
41 reduction in gastric cancer mortality is detectable, corresponding to 73 cases in the  
42 intervention group at 15 years of follow-up. The study size may need to be increased if lower  
43 prevalence of *H. pylori* infection, higher number of women included in the study and/or  
44 lower acceptance/compliance to *H. pylori* eradication therapy are observed.  
45  
46  
47  
48  
49  
50  
51  
52  
53  
54  
55  
56  
57  
58  
59  
60

1  
2  
3 Gastric cancer mortality will be compared between intervention and control groups using a  
4 log-rank test. The survival curves will also be compared with use of the Kaplan-Meier life-  
5 table method and the Cox proportional-hazards model. The stratified randomisation process  
6 should ensure that groups are balanced with respect to age and gender. In addition, a  
7 multivariate Cox proportional hazards model will be used to account for confounding  
8 factors. The effect of confounding factors on the endpoints will be evaluated using  
9 univariate models in the first place. These analyses will be repeated for gastric cancer  
10 incidence difference between the two groups.  
11

12  
13  
14  
15  
16  
17 The study subject recruitment to the pilot phase has just been completed to test  
18 assumptions defined for the study including acceptability and adherence to the intervention,  
19 and *H. pylori* prevalence, and to test the appropriateness of the chosen tools and  
20 infrastructure for the study. In addition, in this phase the accuracy of biomarkers for  
21 detecting atrophy will be evaluated by comparing different alternatives (e.g. different  
22 manufacturer tests, different cut-off values) against histology.  
23  
24  
25  
26

## 27 Discussion

28  
29 *H. pylori* gastritis has been defined as an infectious disease according to the Kyoto Global  
30 Consensus Conference,<sup>12</sup> and once-per-lifetime eradication treatment with antibiotics seems  
31 to be a rational and cost-effective approach to prevent gastric cancer as well as other *H.*  
32 *pylori*-related diseases, including peptic ulcer and functional dyspepsia.<sup>12 23</sup> In high-risk  
33 countries for gastric cancer this would mean giving antibiotic treatment to the majority of  
34 the population, as is the case for Latvia where *H. pylori* prevalence is around 80%.<sup>24</sup> The risk  
35 of adverse events and increased antibiotic resistance are major concerns; the magnitude of  
36 these risks has not been sufficiently investigated in well-controlled studies, and no country  
37 has implemented a population-based *search-and-treat* strategy for *H. pylori*.<sup>17</sup>  
38  
39

40  
41  
42  
43  
44 Pepsinogens are markers for atrophy of the stomach mucosa;<sup>25</sup> decreased pepsinogen  
45 values have been demonstrated to correlate with increased risk of gastric cancer;<sup>26-28</sup>  
46 furthermore, a combination of pepsinogen testing and *H. pylori* detection has been  
47 suggested to be the best available non-invasive option for gastric cancer risk stratification.<sup>13</sup>  
48  
49  
50  
51  
52  
53  
54  
55  
56  
57  
58  
59  
60  
29 However, the accuracy of pepsinogen tests to identify gastric cancer and even atrophy is  
imperfect.<sup>18</sup> There is still a lack of evidence from randomised control trials of combining  
once-per-lifetime eradication of *H. pylori* and screening for high-risk conditions with blood  
markers such as pepsinogens for reducing gastric cancer mortality.

1  
2  
3 Pepsinogen tests to identify atrophy has demonstrated a wide range of sensitivity in various  
4 studies,<sup>18</sup> indicating that several factors may influence pepsinogen levels in different  
5 populations. The GISTAR study will allow us to investigate the role of *H. pylori* infection and  
6 participants' characteristics on the performance of biomarkers for identifying individuals at  
7 high risk of gastric cancer.  
8  
9

10  
11 A few limitations of the study design should be mentioned. Serological detection of *H. pylori*  
12 was selected for the pilot study as the most feasible method in population-based settings.  
13 However, we acknowledge that *H. pylori* antibodies may remain positive following successful  
14 elimination of the bacteria.<sup>30</sup> In order to avoid misclassification in the current study,  
15 participants having received eradication within the last 12 months prior to enrolment will be  
16 not included; however, this cannot exclude the chance of getting a false positive serology  
17 test result completely. Under the circumstances that unacceptably low specificity of the  
18 serological test is observed in the pilot phase, an alternative method to detect *H. pylori* (e.g.  
19 UBT) or a combination of several tests will be applied in the main study. Excluding any  
20 participants having reported a previous eradication could be another alternative.  
21  
22  
23  
24  
25  
26  
27

28  
29 The effect of the intervention would be influenced by participation rates of the target  
30 population and acceptance rate of the *H. pylori* eradication treatment; in addition,  
31 participation in and acceptance of endoscopic examinations would affect the yield of  
32 endoscopic follow-up. The inclusion of colorectal cancer screening as an incentive may  
33 encourage participation and adherence; however, the general participation may be affected  
34 by the fact that only half of the participants are offered *H. pylori* eradication and screening  
35 for precancerous lesions. One of the main limitations of the study is the long term follow-up  
36 that is required to achieve its objectives. We will make multiple efforts to assure compliance  
37 and retention within the study, including periodic phone calls and interim visits.  
38  
39  
40  
41  
42

43  
44 While the randomisation process should ensure that groups are balanced with respect to  
45 age and gender, adjustment of proportion between genders might be required if a  
46 substantially higher proportion of women or men is recruited into the intervention group. To  
47 prevent this, we will make an extra effort to balance the gender ratio by actively inviting  
48 men or women required to obtain proper balance.  
49  
50  
51

52  
53 As described, the study design and the organization of the field work have taken into  
54 account not only the scientific background but also contextual conditions for a successful  
55 implementation and execution of the trial. If new sites outside Latvia are to be included,  
56  
57  
58  
59  
60

1  
2  
3 study design will be adapted to local conditions for better acceptance and affordability  
4 without compromising the scientific objectives.  
5  
6

7 In conclusion, the study would have major public health implications by providing leads for  
8 prevention activities in populations with elevated rates of gastric cancer, particularly in  
9 Baltic and Eastern European regions where the public health burden from the disease is  
10 substantial.  
11  
12

13  
14  
15  
16 **Figure 1.** General study design  
17  
18  
19  
20  
21  
22

### 23 **Declarations**

#### 24 25 26 **List of abbreviations**

27  
28 FIT – laboratory-based faecal immunochemical test

29  
30 *H. pylori* – *Helicobacter pylori*

31  
32 IARC - International Agency for Research on Cancer

33  
34 FFPA - formalin-fixed and paraffin- embedded material

35  
36 MAPS guidelines - Management of precancerous conditions and lesions in the stomach

37  
38 Pg - pepsinogen

39  
40 UBT - <sup>13</sup>C-urea breath test  
41  
42

#### 43 **Ethics, data safety and dissemination**

44  
45 The Ethics Committee of IARC has approved the study protocol 26/03/2013 and the relevant  
46 protocol updates 02/10/2015. reg. No. IEC 12-36; the Ethics Committee of Riga East

47  
48 University Hospital Support foundation has approved the protocol 03/10/2013, reg. No. 14-

49  
50 A/13, and the Central Medical Ethics Committee in Latvia has approved the protocol

51  
52 09/12/2013, reg. No. 01-29.1/11.  
53

54 All the study participants are required to provide signed consent prior the enrolment.

55 An independent Data Safety and Monitoring Board (DSMB) has been established for the

56  
57 GISTAR study which involves experts in epidemiology, statistics, clinical trials,  
58  
59  
60



1  
2  
3 gastroenterology and pathology to safeguard the interests of study participants and to  
4 ensure the scientific validity of the study.

5  
6 The findings will be published in peer-reviewed journals and presented at scientific  
7 meetings. We anticipate that study results will provide necessary information to be  
8 considered in further updates of the European and international guidelines for gastric cancer  
9 prevention and *H. pylori* management.  
10  
11  
12

### 13 14 15 **Availability of data and material**

16  
17 Not applicable since the current manuscript does not contain the results of the study.  
18  
19 Development of study-specific biorepository and data capture system has been described  
20 within the main text.  
21

### 22 23 **Competing interests statement**

24  
25 ML is a partner in institutions involved in realization of the project – Digestive Diseases  
26 Centre GASTRO and Academic Histology laboratory. ILK and SI are employees of Academic  
27 Histology laboratory, IK – of Digestive Diseases Centre GASTRO. Otherwise, the authors  
28 declare that they have no competing interests.  
29  
30  
31

### 32 33 **Funding statement**

34  
35 The study has been supported in part by various funding sources in the University of Latvia;  
36 this includes the funding schemes from the European Regional Development Fund (ERDF)  
37 and the National Program for Research in Latvia: Biomedicine 2014-2017. The protocol  
38 development was supported in part by the project of the European Social Fund No.  
39 009/0220/1DP/1.1.1.2.0/09/APIA/VIAA/016 'Multidisciplinary research group for early  
40 cancer detection and cancer prevention'.  
41  
42  
43  
44

### 45 46 **Authors' contributions**

47  
48 ML, JYP, MP, RH have been involved in initial design of the protocol, JYP, SP, ILK, SI, IK, DR,  
49 AK, DS, ID, VF committed to developing particular specialized parts of the protocol; RM, IP,  
50 RH committed to adjusted version of the initial protocol, MP, JYP, RM – to the statistical  
51 evaluations and study sample size estimates, ML, JYP and RM wrote the manuscript, all co-  
52 authors – have participated in improvements to the manuscript and acceptance of it.  
53  
54  
55  
56  
57  
58  
59  
60

### Data Sharing Statement

Data from the pilot study are currently being analysed to be presented in further publications. These data are available to the principal investigators, study statistician and DSMB members. The results will be disseminated during international and national conferences and congresses, published in peer-reviewed papers.

### Acknowledgements

We acknowledge the contribution of the DSMB members: Iris Lansdorp-Vogelaar, Jack Cuzick, Fatima Carneiro, Ernst Kuipers, Jose Machado, Peter Malfertheiner, Colm O'Morain and Mangesh Thorat. Special thanks to Ann Zuber and Olof Nyren for the valuable input to the protocol design as well as to Hossam Haick, Lars Engstrand and other members to the protocol workshop. Particular acknowledgements to administrative-managing staff of the study - Aiga Rudule, Inga Upmace, Janis Kotlers.

The study would not have been possible without the involvement of medical professional organizations, in particular Digestive Diseases Centre GASTRO, Academic Histology laboratory, Insights-A as well as municipalities and their healthcare institutions in Cesis, Aluksne, Ludza, Saldus and Tukums regions of Latvia. We appreciate the support from industry for the special conditions in supplying with reagents, equipment, medication and/or professional advice – BIOHIT, Oyi., Eiken Chemical Co., Meridian Bioscience, Inc., KRKA, Fujifilm Europe.

The study has been endorsed by European Helicobacter and Microbiota Study Group (EHMSG), Healthy Stomach Initiative (HIS) and International Digestive Cancer alliance (IDCA). Support has been provided by the Riga East University hospital Support Foundation. We acknowledge also the support from the Ministry of Health of Latvia.

## REFERENCES

1. Herrero R, Parsonnet J, Greenberg ER. Prevention of gastric cancer. *JAMA* 2014;312(12):1197-8.
2. Pasechnikov V, Chukov S, Fedorov E, *et al.* Gastric cancer: Prevention, screening and early diagnosis. *World J Gastroenterol* 2014;20(38):13842-62.
3. Jemal A, Bray F, Center MM, *et al.* Global cancer statistics. *CA: A Cancer Journal for Clinicians* 2011;61(2):69-90.
4. Ferlay J, Parkin DM, Steliarova-Foucher E. Estimates of cancer incidence and mortality in Europe in 2008. *European journal of cancer (Oxford, England : 1990)* 2010;46(4):765-81.
5. Ferlay J, Steliarova-Foucher E, Lortet-Tieulent J, *et al.* Cancer incidence and mortality patterns in Europe: estimates for 40 countries in 2012. *Eur J Cancer* 2013;49(6):1374-403.
6. IARC Working Group on the Evaluation of Carcinogenic Risks to Humans. Schistosomes, liver flukes and *Helicobacter pylori* *IARC Monogr Eval Carcinog Risks Hum* 1994;61:1-241.
7. IARC. Monographs on the evaluation of carcinogenic risks to humans, volume 100. A review of carcinogen - Part B: biological agents. Lyon: International Agency for Research on Cancer 2011.
8. Plummer M, Franceschi S, Vignat J, *et al.* Global burden of gastric cancer attributable to *Helicobacter pylori*. *Int J Cancer* 2015;136(2):487-90.
9. Lansdorp-Vogelaar I, Sharp L. Cost-effectiveness of screening and treating *Helicobacter pylori* for gastric cancer prevention. *Best Pract Res Clin Gastroenterol* 2013;27(6):933-47.
10. Areia M, Carvalho R, Cadime AT, *et al.* Screening for gastric cancer and surveillance of premalignant lesions: a systematic review of cost-effectiveness studies. *Helicobacter* 2013;18(5):325-37.
11. Moayyedi P. Feasibility and cost effectiveness of population-based *H. pylori* eradication. In: IARC *Helicobacter pylori* Working Group *Helicobacter pylori* Eradication as a Strategy for Preventing Gastric Cancer Lyon, France: International Agency for Research on Cancer (IARC Working Group Reports, No 8); pp 174-180 Available from: <http://www.iarcfr/en/publications/pdfs-online/wrk/wrk8/indexphp2014>.
12. Sugano K, Tack J, Kuipers EJ, *et al.* Kyoto global consensus report on *Helicobacter pylori* gastritis. *Gut* 2015;64(9):1353-67.

- 1  
2  
3 13. Malfertheiner P, Megraud F, O'Morain CA, *et al.* Management of *Helicobacter pylori*  
4 infection-the Maastricht V/Florence Consensus Report. *Gut* 2017;66(1):6-30.
- 5  
6 14. Malhotra-Kumar S, Lammens C, Coenen S, *et al.* Effect of azithromycin and  
7 clarithromycin therapy on pharyngeal carriage of macrolide-resistant streptococci in  
8 healthy volunteers: a randomised, double-blind, placebo-controlled study. *Lancet*  
9 2007;369(9560):482-90.
- 10  
11 15. Derakhshan MH, Arnold M, Brewster DH, *et al.* Worldwide Inverse Association between  
12 Gastric Cancer and Esophageal Adenocarcinoma Suggesting a Common  
13 Environmental Factor Exerting Opposing Effects. *Am J Gastroenterol*  
14 2016;111(2):228-39.
- 15  
16 16. Lonnberg S, Sekerija M, Malila N, *et al.* Cancer screening: policy recommendations on  
17 governance, organization and evaluation of cancer screening. In: European Guide on  
18 Quality Improvement in Comprehensive Cancer Control Available from:  
19 <http://www.cancercontroleu/guide-landing-page/>. Belgium: National Institute of  
20 Public Health, Slovenia, Scientific Institute of Public Health, Belgium 2017:39-76.
- 21  
22 17. Leja M, You W, Camargo MC, *et al.* Implementation of gastric cancer screening - The  
23 global experience. *Best practice & research Clinical gastroenterology*  
24 2014;28(6):1093-106.
- 25  
26 18. Huang YK, Yu JC, Kang WM, *et al.* Significance of Serum Pepsinogens as a Biomarker for  
27 Gastric Cancer and Atrophic Gastritis Screening: A Systematic Review and Meta-  
28 Analysis. *PLoS One* 2015;10(11):e0142080.
- 29  
30 19. IARC. World Health Organization Cancer mortality database, available from [http://www-](http://www-dep.iarc.fr/WHODb/WHODb.htm)  
31 [dep.iarc.fr/WHODb/WHODb.htm](http://www-dep.iarc.fr/WHODb/WHODb.htm). Accessed on 29/02/2016. 2015
- 32  
33 20. Dixon MF, Genta RM, Yardley JH, *et al.* Classification and grading of gastritis. The  
34 updated Sydney System. International Workshop on the Histopathology of Gastritis,  
35 Houston 1994. *Am J Surg Pathol* 1996;20(10):1161-81.
- 36  
37 21. Dinis-Ribeiro M, Areia M, de Vries AC, *et al.* Management of precancerous conditions  
38 and lesions in the stomach (MAPS): guideline from the European Society of  
39 Gastrointestinal Endoscopy (ESGE), European *Helicobacter* Study Group (EHSg),  
40 European Society of Pathology (ESP), and the Sociedade Portuguesa de Endoscopia  
41 Digestiva (SPED). *Endoscopy* 2012;44(1):74-94.
- 42  
43 22. Ferlay J, Shin HR, Bray F, *et al.* GLOBOCAN 2008 v1.2, Cancer Incidence and Mortality  
44 Worldwide: IARC CancerBase No. 10 [Internet]. Lyon, France: International Agency  
45  
46  
47  
48  
49  
50  
51  
52  
53  
54  
55  
56  
57  
58  
59  
60

1  
2  
3 for Research on Cancer Available from: <http://globocan.iarc.fr>, accessed on  
4 22/12/2011 2010  
5

- 6 23. Ford AC, Forman D, Hunt RH, *et al.* Helicobacter pylori eradication therapy to prevent  
7 gastric cancer in healthy asymptomatic infected individuals: systematic review and  
8 meta-analysis of randomised controlled trials. *BMJ* 2014;348:g3174.  
9  
10 24. Leja M, Cine E, Rudzite D, *et al.* Prevalence of Helicobacter pylori infection and atrophic  
11 gastritis in Latvia. *Eur J Gastroenterol Hepatol* 2012;24(12):1410-7.  
12  
13 25. Agreus L, Kuipers EJ, Kupcinskas L, *et al.* Rationale in diagnosis and screening of atrophic  
14 gastritis with stomach-specific plasma biomarkers. *Scand J Gastroenterol*  
15 2012;47(2):136-47.  
16  
17 26. Oishi Y, Kiyohara Y, Kubo M, *et al.* The serum pepsinogen test as a predictor of gastric  
18 cancer: the Hisayama study. *Am J Epidemiol* 2006;163(7):629-37.  
19  
20 27. Yanaoka K, Oka M, Mukoubayashi C, *et al.* Cancer high-risk subjects identified by serum  
21 pepsinogen tests: outcomes after 10-year follow-up in asymptomatic middle-aged  
22 males. *Cancer epidemiology, biomarkers & prevention : a publication of the*  
23 *American Association for Cancer Research, cosponsored by the American Society of*  
24 *Preventive Oncology* 2008;17(4):838-45.  
25  
26 28. Kurilovich S, Belkovets A, Reshetnikov O, *et al.* Stomach-specific Biomarkers  
27 (GastroPanel) Can Predict the Development of Gastric Cancer in a Caucasian  
28 Population: A Longitudinal Nested Case-Control Study in Siberia. *Anticancer research*  
29 2016;36(1):247-53.  
30  
31 29. Miki K. Gastric cancer screening by combined assay for serum anti-Helicobacter pylori  
32 IgG antibody and serum pepsinogen levels - "ABC method". *Proc Jpn Acad Ser B Phys*  
33 *Biol Sci* 2011;87(7):405-14.  
34  
35 30. Atkinson NS, Braden B. Helicobacter Pylori Infection: Diagnostic Strategies in Primary  
36 Diagnosis and After Therapy. *Digestive diseases and sciences* 2016;61(1):19-24.  
37  
38  
39  
40  
41  
42  
43  
44  
45  
46  
47  
48  
49  
50  
51  
52  
53  
54  
55  
56  
57  
58  
59  
60

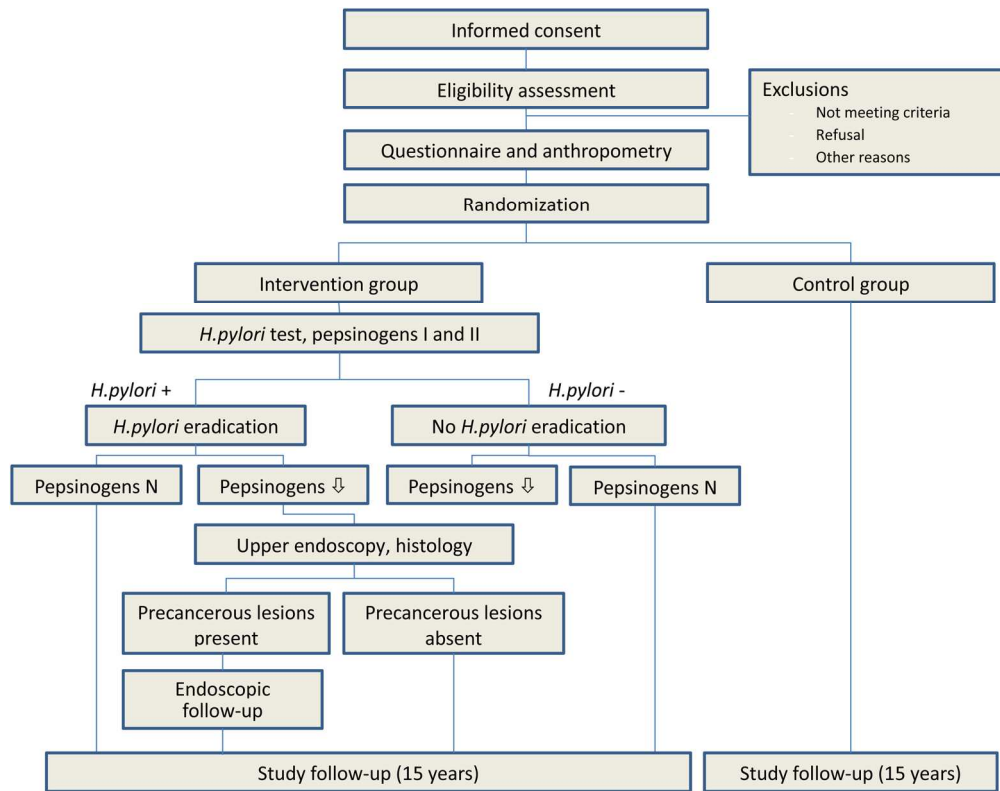

173x136mm (300 x 300 DPI)

For peer review only

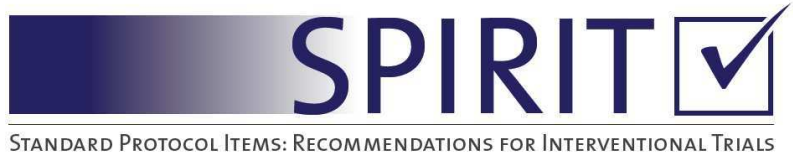

1  
2  
3  
4  
5  
6  
7  
8  
9  
10  
11  
12  
13  
14  
15  
16  
17  
18  
19  
20  
21  
22  
23  
24  
25  
26  
27  
28  
29  
30  
31  
32  
33  
34  
35  
36  
37  
38  
39  
40  
41  
42  
43  
44  
45  
46  
47  
48  
49

SPIRIT 2013 Checklist: Recommended items to address in a clinical trial protocol and related documents\*

| Section/item                      | Item No | Description                                                                                                                                                                                                                                                                              | Addressed on page number |
|-----------------------------------|---------|------------------------------------------------------------------------------------------------------------------------------------------------------------------------------------------------------------------------------------------------------------------------------------------|--------------------------|
| <b>Administrative information</b> |         |                                                                                                                                                                                                                                                                                          |                          |
| Title                             | 1       | Descriptive title identifying the study design, population, interventions, and, if applicable, trial acronym                                                                                                                                                                             | 1                        |
| Trial registration                | 2a      | Trial identifier and registry name. If not yet registered, name of intended registry                                                                                                                                                                                                     | 3, 7                     |
|                                   | 2b      | All items from the World Health Organization Trial Registration Data Set                                                                                                                                                                                                                 | NA                       |
| Protocol version                  | 3       | Date and version identifier                                                                                                                                                                                                                                                              | 7                        |
| Funding                           | 4       | Sources and types of financial, material, and other support                                                                                                                                                                                                                              | 14, 15                   |
| Roles and responsibilities        | 5a      | Names, affiliations, and roles of protocol contributors                                                                                                                                                                                                                                  | 1,2                      |
|                                   | 5b      | Name and contact information for the trial sponsor                                                                                                                                                                                                                                       | 2, 14                    |
|                                   | 5c      | Role of study sponsor and funders, if any, in study design; collection, management, analysis, and interpretation of data; writing of the report; and the decision to submit the report for publication, including whether they will have ultimate authority over any of these activities | 14                       |
|                                   | 5d      | Composition, roles, and responsibilities of the coordinating centre, steering committee, endpoint adjudication committee, data management team, and other individuals or groups overseeing the trial, if applicable (see Item 21a for data monitoring committee)                         | 14, 15                   |

1  
2  
3 **Introduction**  
4

|                  |    |                                                                                                               |     |
|------------------|----|---------------------------------------------------------------------------------------------------------------|-----|
| 5 Background and | 6a | Description of research question and justification for undertaking the trial, including summary of relevant   | 5-7 |
| 6 rationale      |    | studies (published and unpublished) examining benefits and harms for each intervention                        |     |
| 7                |    |                                                                                                               |     |
| 8                | 6b | Explanation for choice of comparators                                                                         | 5-6 |
| 9                |    |                                                                                                               |     |
| 10 Objectives    | 7  | Specific objectives or hypotheses                                                                             | 6-7 |
| 11               |    |                                                                                                               |     |
| 12 Trial design  | 8  | Description of trial design including type of trial (eg, parallel group, crossover, factorial, single group), |     |
| 13               |    | allocation ratio, and framework (eg, superiority, equivalence, noninferiority, exploratory)                   | 8   |
| 14               |    |                                                                                                               |     |

15  
16 **Methods: Participants, interventions, and outcomes**  
17

|                         |     |                                                                                                               |        |
|-------------------------|-----|---------------------------------------------------------------------------------------------------------------|--------|
| 18 Study setting        | 9   | Description of study settings (eg, community clinic, academic hospital) and list of countries where data will | 7-8    |
| 19                      |     | be collected. Reference to where list of study sites can be obtained                                          |        |
| 20                      |     |                                                                                                               |        |
| 21 Eligibility criteria | 10  | Inclusion and exclusion criteria for participants. If applicable, eligibility criteria for study centres and  | 7-8    |
| 22                      |     | individuals who will perform the interventions (eg, surgeons, psychotherapists)                               |        |
| 23                      |     |                                                                                                               |        |
| 24 Interventions        | 11a | Interventions for each group with sufficient detail to allow replication, including how and when they will be | 8-9    |
| 25                      |     | administered                                                                                                  |        |
| 26                      |     |                                                                                                               |        |
| 27                      | 11b | Criteria for discontinuing or modifying allocated interventions for a given trial participant (eg, drug dose  | 8-9    |
| 28                      |     | change in response to harms, participant request, or improving/worsening disease)                             |        |
| 29                      |     |                                                                                                               |        |
| 30                      | 11c | Strategies to improve adherence to intervention protocols, and any procedures for monitoring adherence        | 7, 11  |
| 31                      |     | (eg, drug tablet return, laboratory tests)                                                                    |        |
| 32                      |     |                                                                                                               |        |
| 33                      | 11d | Relevant concomitant care and interventions that are permitted or prohibited during the trial                 | 7      |
| 34                      |     |                                                                                                               |        |
| 35 Outcomes             | 12  | Primary, secondary, and other outcomes, including the specific measurement variable (eg, systolic blood       | 10, 11 |
| 36                      |     | pressure), analysis metric (eg, change from baseline, final value, time to event), method of aggregation (eg, |        |
| 37                      |     | median, proportion), and time point for each outcome. Explanation of the clinical relevance of chosen         |        |
| 38                      |     | efficacy and harm outcomes is strongly recommended                                                            |        |
| 39                      |     |                                                                                                               |        |
| 40                      |     |                                                                                                               |        |
| 41 Participant timeline | 13  | Time schedule of enrolment, interventions (including any run-ins and washouts), assessments, and visits for   | 10     |
| 42                      |     | participants. A schematic diagram is highly recommended (see Figure)                                          |        |
| 43                      |     |                                                                                                               |        |
| 44                      |     |                                                                                                               |        |
| 45                      |     |                                                                                                               |        |



|   |             |    |                                                                                                                                                                                       |    |
|---|-------------|----|---------------------------------------------------------------------------------------------------------------------------------------------------------------------------------------|----|
| 1 |             |    |                                                                                                                                                                                       |    |
| 2 |             |    |                                                                                                                                                                                       |    |
| 3 | Sample size | 14 | Estimated number of participants needed to achieve study objectives and how it was determined, including clinical and statistical assumptions supporting any sample size calculations | 10 |
| 4 |             |    |                                                                                                                                                                                       |    |
| 5 |             |    |                                                                                                                                                                                       |    |
| 6 | Recruitment | 15 | Strategies for achieving adequate participant enrolment to reach target sample size                                                                                                   | 7  |
| 7 |             |    |                                                                                                                                                                                       |    |

### 8 **Methods: Assignment of interventions (for controlled trials)**

#### 9 Allocation:

|    |                                  |     |                                                                                                                                                                                                                                                                                                                                                          |      |
|----|----------------------------------|-----|----------------------------------------------------------------------------------------------------------------------------------------------------------------------------------------------------------------------------------------------------------------------------------------------------------------------------------------------------------|------|
| 10 |                                  |     |                                                                                                                                                                                                                                                                                                                                                          |      |
| 11 |                                  |     |                                                                                                                                                                                                                                                                                                                                                          |      |
| 12 | Sequence generation              | 16a | Method of generating the allocation sequence (eg, computer-generated random numbers), and list of any factors for stratification. To reduce predictability of a random sequence, details of any planned restriction (eg, blocking) should be provided in a separate document that is unavailable to those who enrol participants or assign interventions | 7, 9 |
| 13 |                                  |     |                                                                                                                                                                                                                                                                                                                                                          |      |
| 14 |                                  |     |                                                                                                                                                                                                                                                                                                                                                          |      |
| 15 |                                  |     |                                                                                                                                                                                                                                                                                                                                                          |      |
| 16 |                                  |     |                                                                                                                                                                                                                                                                                                                                                          |      |
| 17 |                                  |     |                                                                                                                                                                                                                                                                                                                                                          |      |
| 18 | Allocation concealment mechanism | 16b | Mechanism of implementing the allocation sequence (eg, central telephone; sequentially numbered, opaque, sealed envelopes), describing any steps to conceal the sequence until interventions are assigned                                                                                                                                                | 9    |
| 19 |                                  |     |                                                                                                                                                                                                                                                                                                                                                          |      |
| 20 |                                  |     |                                                                                                                                                                                                                                                                                                                                                          |      |
| 21 |                                  |     |                                                                                                                                                                                                                                                                                                                                                          |      |
| 22 | Implementation                   | 16c | Who will generate the allocation sequence, who will enrol participants, and who will assign participants to interventions                                                                                                                                                                                                                                | 7, 9 |
| 23 |                                  |     |                                                                                                                                                                                                                                                                                                                                                          |      |
| 24 |                                  |     |                                                                                                                                                                                                                                                                                                                                                          |      |
| 25 | Blinding (masking)               | 17a | Who will be blinded after assignment to interventions (eg, trial participants, care providers, outcome assessors, data analysts), and how                                                                                                                                                                                                                | NA   |
| 26 |                                  |     |                                                                                                                                                                                                                                                                                                                                                          |      |
| 27 |                                  |     |                                                                                                                                                                                                                                                                                                                                                          |      |
| 28 |                                  | 17b | If blinded, circumstances under which unblinding is permissible, and procedure for revealing a participant's allocated intervention during the trial                                                                                                                                                                                                     | NA   |
| 29 |                                  |     |                                                                                                                                                                                                                                                                                                                                                          |      |
| 30 |                                  |     |                                                                                                                                                                                                                                                                                                                                                          |      |
| 31 |                                  |     |                                                                                                                                                                                                                                                                                                                                                          |      |

### 32 **Methods: Data collection, management, and analysis**

|    |                         |     |                                                                                                                                                                                                                                                                                                                                                                                                              |       |
|----|-------------------------|-----|--------------------------------------------------------------------------------------------------------------------------------------------------------------------------------------------------------------------------------------------------------------------------------------------------------------------------------------------------------------------------------------------------------------|-------|
| 33 |                         |     |                                                                                                                                                                                                                                                                                                                                                                                                              |       |
| 34 | Data collection methods | 18a | Plans for assessment and collection of outcome, baseline, and other trial data, including any related processes to promote data quality (eg, duplicate measurements, training of assessors) and a description of study instruments (eg, questionnaires, laboratory tests) along with their reliability and validity, if known. Reference to where data collection forms can be found, if not in the protocol | 9, 10 |
| 35 |                         |     |                                                                                                                                                                                                                                                                                                                                                                                                              |       |
| 36 |                         |     |                                                                                                                                                                                                                                                                                                                                                                                                              |       |
| 37 |                         |     |                                                                                                                                                                                                                                                                                                                                                                                                              |       |
| 38 |                         |     |                                                                                                                                                                                                                                                                                                                                                                                                              |       |
| 39 |                         | 18b | Plans to promote participant retention and complete follow-up, including list of any outcome data to be collected for participants who discontinue or deviate from intervention protocols                                                                                                                                                                                                                    | 12    |
| 40 |                         |     |                                                                                                                                                                                                                                                                                                                                                                                                              |       |
| 41 |                         |     |                                                                                                                                                                                                                                                                                                                                                                                                              |       |
| 42 |                         |     |                                                                                                                                                                                                                                                                                                                                                                                                              |       |
| 43 |                         |     |                                                                                                                                                                                                                                                                                                                                                                                                              |       |
| 44 |                         |     |                                                                                                                                                                                                                                                                                                                                                                                                              |       |
| 45 |                         |     |                                                                                                                                                                                                                                                                                                                                                                                                              |       |

|    |                     |     |                                                                                                                                                                                                                                                                   |       |
|----|---------------------|-----|-------------------------------------------------------------------------------------------------------------------------------------------------------------------------------------------------------------------------------------------------------------------|-------|
| 1  |                     |     |                                                                                                                                                                                                                                                                   |       |
| 2  |                     |     |                                                                                                                                                                                                                                                                   |       |
| 3  | Data management     | 19  | Plans for data entry, coding, security, and storage, including any related processes to promote data quality (eg, double data entry; range checks for data values). Reference to where details of data management procedures can be found, if not in the protocol | 9, 10 |
| 4  |                     |     |                                                                                                                                                                                                                                                                   |       |
| 5  |                     |     |                                                                                                                                                                                                                                                                   |       |
| 6  |                     |     |                                                                                                                                                                                                                                                                   |       |
| 7  | Statistical methods | 20a | Statistical methods for analysing primary and secondary outcomes. Reference to where other details of the statistical analysis plan can be found, if not in the protocol                                                                                          | 9     |
| 8  |                     |     |                                                                                                                                                                                                                                                                   |       |
| 9  |                     |     |                                                                                                                                                                                                                                                                   |       |
| 10 |                     | 20b | Methods for any additional analyses (eg, subgroup and adjusted analyses)                                                                                                                                                                                          | 9     |
| 11 |                     |     |                                                                                                                                                                                                                                                                   |       |
| 12 |                     | 20c | Definition of analysis population relating to protocol non-adherence (eg, as randomised analysis), and any statistical methods to handle missing data (eg, multiple imputation)                                                                                   | NA    |
| 13 |                     |     |                                                                                                                                                                                                                                                                   |       |
| 14 |                     |     |                                                                                                                                                                                                                                                                   |       |
| 15 |                     |     |                                                                                                                                                                                                                                                                   |       |

### 16 **Methods: Monitoring**

|    |                 |     |                                                                                                                                                                                                                                                                                                                                       |    |
|----|-----------------|-----|---------------------------------------------------------------------------------------------------------------------------------------------------------------------------------------------------------------------------------------------------------------------------------------------------------------------------------------|----|
| 17 |                 |     |                                                                                                                                                                                                                                                                                                                                       |    |
| 18 | Data monitoring | 21a | Composition of data monitoring committee (DMC); summary of its role and reporting structure; statement of whether it is independent from the sponsor and competing interests; and reference to where further details about its charter can be found, if not in the protocol. Alternatively, an explanation of why a DMC is not needed | 13 |
| 19 |                 |     |                                                                                                                                                                                                                                                                                                                                       |    |
| 20 |                 |     |                                                                                                                                                                                                                                                                                                                                       |    |
| 21 |                 |     |                                                                                                                                                                                                                                                                                                                                       |    |
| 22 |                 |     |                                                                                                                                                                                                                                                                                                                                       |    |
| 23 |                 | 21b | Description of any interim analyses and stopping guidelines, including who will have access to these interim results and make the final decision to terminate the trial                                                                                                                                                               | 13 |
| 24 |                 |     |                                                                                                                                                                                                                                                                                                                                       |    |
| 25 |                 |     |                                                                                                                                                                                                                                                                                                                                       |    |
| 26 | Harms           | 22  | Plans for collecting, assessing, reporting, and managing solicited and spontaneously reported adverse events and other unintended effects of trial interventions or trial conduct                                                                                                                                                     | 13 |
| 27 |                 |     |                                                                                                                                                                                                                                                                                                                                       |    |
| 28 |                 |     |                                                                                                                                                                                                                                                                                                                                       |    |
| 29 | Auditing        | 23  | Frequency and procedures for auditing trial conduct, if any, and whether the process will be independent from investigators and the sponsor                                                                                                                                                                                           | 13 |
| 30 |                 |     |                                                                                                                                                                                                                                                                                                                                       |    |
| 31 |                 |     |                                                                                                                                                                                                                                                                                                                                       |    |
| 32 |                 |     |                                                                                                                                                                                                                                                                                                                                       |    |

### 33 **Ethics and dissemination**

|    |                          |    |                                                                                                                                                                                                                                  |    |
|----|--------------------------|----|----------------------------------------------------------------------------------------------------------------------------------------------------------------------------------------------------------------------------------|----|
| 34 |                          |    |                                                                                                                                                                                                                                  |    |
| 35 | Research ethics approval | 24 | Plans for seeking research ethics committee/institutional review board (REC/IRB) approval                                                                                                                                        | 13 |
| 36 |                          |    |                                                                                                                                                                                                                                  |    |
| 37 |                          |    |                                                                                                                                                                                                                                  |    |
| 38 | Protocol amendments      | 25 | Plans for communicating important protocol modifications (eg, changes to eligibility criteria, outcomes, analyses) to relevant parties (eg, investigators, REC/IRBs, trial participants, trial registries, journals, regulators) | 13 |
| 39 |                          |    |                                                                                                                                                                                                                                  |    |
| 40 |                          |    |                                                                                                                                                                                                                                  |    |
| 41 |                          |    |                                                                                                                                                                                                                                  |    |
| 42 |                          |    |                                                                                                                                                                                                                                  |    |
| 43 |                          |    |                                                                                                                                                                                                                                  |    |
| 44 |                          |    |                                                                                                                                                                                                                                  |    |
| 45 |                          |    |                                                                                                                                                                                                                                  |    |

|    |                               |     |                                                                                                                                                                                                                                                                                     |       |
|----|-------------------------------|-----|-------------------------------------------------------------------------------------------------------------------------------------------------------------------------------------------------------------------------------------------------------------------------------------|-------|
| 1  |                               |     |                                                                                                                                                                                                                                                                                     |       |
| 2  |                               |     |                                                                                                                                                                                                                                                                                     |       |
| 3  | Consent or assent             | 26a | Who will obtain informed consent or assent from potential trial participants or authorised surrogates, and how (see Item 32)                                                                                                                                                        | 7     |
| 4  |                               |     |                                                                                                                                                                                                                                                                                     |       |
| 5  |                               |     |                                                                                                                                                                                                                                                                                     |       |
| 6  |                               | 26b | Additional consent provisions for collection and use of participant data and biological specimens in ancillary studies, if applicable                                                                                                                                               | 7, 9  |
| 7  |                               |     |                                                                                                                                                                                                                                                                                     |       |
| 8  |                               |     |                                                                                                                                                                                                                                                                                     |       |
| 9  | Confidentiality               | 27  | How personal information about potential and enrolled participants will be collected, shared, and maintained in order to protect confidentiality before, during, and after the trial                                                                                                | 9     |
| 10 |                               |     |                                                                                                                                                                                                                                                                                     |       |
| 11 |                               |     |                                                                                                                                                                                                                                                                                     |       |
| 12 | Declaration of interests      | 28  | Financial and other competing interests for principal investigators for the overall trial and each study site                                                                                                                                                                       | 14    |
| 13 |                               |     |                                                                                                                                                                                                                                                                                     |       |
| 14 |                               |     |                                                                                                                                                                                                                                                                                     |       |
| 15 | Access to data                | 29  | Statement of who will have access to the final trial dataset, and disclosure of contractual agreements that limit such access for investigators                                                                                                                                     | 13-15 |
| 16 |                               |     |                                                                                                                                                                                                                                                                                     |       |
| 17 |                               |     |                                                                                                                                                                                                                                                                                     |       |
| 18 | Ancillary and post-trial care | 30  | Provisions, if any, for ancillary and post-trial care, and for compensation to those who suffer harm from trial participation                                                                                                                                                       | NA    |
| 19 |                               |     |                                                                                                                                                                                                                                                                                     |       |
| 20 |                               |     |                                                                                                                                                                                                                                                                                     |       |
| 21 | Dissemination policy          | 31a | Plans for investigators and sponsor to communicate trial results to participants, healthcare professionals, the public, and other relevant groups (eg, via publication, reporting in results databases, or other data sharing arrangements), including any publication restrictions | 13    |
| 22 |                               |     |                                                                                                                                                                                                                                                                                     |       |
| 23 |                               |     |                                                                                                                                                                                                                                                                                     |       |
| 24 |                               |     |                                                                                                                                                                                                                                                                                     |       |
| 25 |                               |     |                                                                                                                                                                                                                                                                                     |       |
| 26 |                               | 31b | Authorship eligibility guidelines and any intended use of professional writers                                                                                                                                                                                                      | 13    |
| 27 |                               |     |                                                                                                                                                                                                                                                                                     |       |
| 28 |                               | 31c | Plans, if any, for granting public access to the full protocol, participant-level dataset, and statistical code                                                                                                                                                                     | NA    |
| 29 |                               |     |                                                                                                                                                                                                                                                                                     |       |
| 30 | <b>Appendices</b>             |     |                                                                                                                                                                                                                                                                                     |       |
| 31 |                               |     |                                                                                                                                                                                                                                                                                     |       |
| 32 | Informed consent materials    | 32  | Model consent form and other related documentation given to participants and authorised surrogates                                                                                                                                                                                  | NA    |
| 33 |                               |     |                                                                                                                                                                                                                                                                                     |       |
| 34 |                               |     |                                                                                                                                                                                                                                                                                     |       |
| 35 | Biological specimens          | 33  | Plans for collection, laboratory evaluation, and storage of biological specimens for genetic or molecular analysis in the current trial and for future use in ancillary studies, if applicable                                                                                      | 9, 10 |
| 36 |                               |     |                                                                                                                                                                                                                                                                                     |       |
| 37 |                               |     |                                                                                                                                                                                                                                                                                     |       |

38 \*It is strongly recommended that this checklist be read in conjunction with the SPIRIT 2013 Explanation & Elaboration for important clarification on the items.  
 39 Amendments to the protocol should be tracked and dated. The SPIRIT checklist is copyrighted by the SPIRIT Group under the Creative Commons  
 40 "[Attribution-NonCommercial-NoDerivs 3.0 Unported](https://creativecommons.org/licenses/by-nc-nd/3.0/)" license.  
 41

# BMJ Open

## Multicentric randomized study of *H. pylori* eradication and pepsinogen testing for prevention of gastric cancer mortality: the GISTAR study

|                                 |                                                                                                                                                                                                                                                                                                                                                                                                                                                                                                                                                                                                                                                                                                                                                                                                                                                                                                                                                                                                                                                                                                                                                                                                                                                                                                                                                                                                                                                                                                                                                                                                                                                                                                                                                                                                                                                                                                                                                                                           |
|---------------------------------|-------------------------------------------------------------------------------------------------------------------------------------------------------------------------------------------------------------------------------------------------------------------------------------------------------------------------------------------------------------------------------------------------------------------------------------------------------------------------------------------------------------------------------------------------------------------------------------------------------------------------------------------------------------------------------------------------------------------------------------------------------------------------------------------------------------------------------------------------------------------------------------------------------------------------------------------------------------------------------------------------------------------------------------------------------------------------------------------------------------------------------------------------------------------------------------------------------------------------------------------------------------------------------------------------------------------------------------------------------------------------------------------------------------------------------------------------------------------------------------------------------------------------------------------------------------------------------------------------------------------------------------------------------------------------------------------------------------------------------------------------------------------------------------------------------------------------------------------------------------------------------------------------------------------------------------------------------------------------------------------|
| Journal:                        | <i>BMJ Open</i>                                                                                                                                                                                                                                                                                                                                                                                                                                                                                                                                                                                                                                                                                                                                                                                                                                                                                                                                                                                                                                                                                                                                                                                                                                                                                                                                                                                                                                                                                                                                                                                                                                                                                                                                                                                                                                                                                                                                                                           |
| Manuscript ID                   | bmjopen-2017-016999.R1                                                                                                                                                                                                                                                                                                                                                                                                                                                                                                                                                                                                                                                                                                                                                                                                                                                                                                                                                                                                                                                                                                                                                                                                                                                                                                                                                                                                                                                                                                                                                                                                                                                                                                                                                                                                                                                                                                                                                                    |
| Article Type:                   | Protocol                                                                                                                                                                                                                                                                                                                                                                                                                                                                                                                                                                                                                                                                                                                                                                                                                                                                                                                                                                                                                                                                                                                                                                                                                                                                                                                                                                                                                                                                                                                                                                                                                                                                                                                                                                                                                                                                                                                                                                                  |
| Date Submitted by the Author:   | 14-Jun-2017                                                                                                                                                                                                                                                                                                                                                                                                                                                                                                                                                                                                                                                                                                                                                                                                                                                                                                                                                                                                                                                                                                                                                                                                                                                                                                                                                                                                                                                                                                                                                                                                                                                                                                                                                                                                                                                                                                                                                                               |
| Complete List of Authors:       | <p>Leja, Marcis; Latvijas Universitate, Institute of Clinical and Preventive Medicine<br/> Park, Jin Young; International Agency for Research on Cancer, Prevention and Implementation Group<br/> Murillo, Raul; International Agency for Research on Cancer, Prevention and Implementation Group<br/> Liepniece-Karele, Inta; Latvijas Universitate, Institute of Clinical and Preventive Medicine ; Rigas Austrumu kliniska universitates slimnica, Department of Research<br/> Isajevs, Sergejs; Latvijas Universitate, Institute of Clinical and Preventive Medicine; Rigas Austrumu kliniska universitates slimnica, Department of Research<br/> Kikuste, Ilze; Latvijas Universitate, Institute of Clinical and Preventive Medicine; Digestive Diseases Centre GASTRO<br/> Rudzite, Dace; Latvijas Universitate, Institute of Clinical and Preventive Medicine ; Rigas Austrumu kliniska universitates slimnica, Department of Research<br/> Krike, Petra; Latvijas Universitate, Institute of Clinical and Preventive Medicine<br/> Parshutin, Sergei; Latvijas Universitate, Institute of Clinical and Preventive Medicine ; Rigas Tehniska universitate, Institute of Information Technology<br/> Polaka, Inese; Latvijas Universitate, Institute of Clinical and Preventive Medicine; Rigas Tehniska universitate, Institute of Information Technology<br/> Kirsners, Arnis; Latvijas Universitate, Institute of Clinical and Preventive Medicine; Rigas Tehniska universitate, Institute of Information Technology<br/> Santare, Daiga; Latvijas Universitate, Institute of Clinical and Preventive Medicine; Rigas Austrumu kliniska universitates slimnica, Department of Research<br/> Folkmanis, Valdis; Latvijas Universitate, Faculty of Medicine<br/> Daugule, Ilva; Latvijas Universitate, Institute of Clinical and Preventive Medicine<br/> Plummer, Martyn; International Agency for Research on Cancer, Herrero, Rolando; IARC, Early Detection and Prevention</p> |
| <b>Primary Subject Heading</b>: | Public health                                                                                                                                                                                                                                                                                                                                                                                                                                                                                                                                                                                                                                                                                                                                                                                                                                                                                                                                                                                                                                                                                                                                                                                                                                                                                                                                                                                                                                                                                                                                                                                                                                                                                                                                                                                                                                                                                                                                                                             |
| Secondary Subject Heading:      | Gastroenterology and hepatology, Oncology, Epidemiology                                                                                                                                                                                                                                                                                                                                                                                                                                                                                                                                                                                                                                                                                                                                                                                                                                                                                                                                                                                                                                                                                                                                                                                                                                                                                                                                                                                                                                                                                                                                                                                                                                                                                                                                                                                                                                                                                                                                   |
| Keywords:                       | Gastric cancer, prevention, <i>H. pylori</i> , eradication, pepsinogen, randomised                                                                                                                                                                                                                                                                                                                                                                                                                                                                                                                                                                                                                                                                                                                                                                                                                                                                                                                                                                                                                                                                                                                                                                                                                                                                                                                                                                                                                                                                                                                                                                                                                                                                                                                                                                                                                                                                                                        |

1  
2  
3  
4  
5  
6  
7  
8  
9  
10  
11  
12  
13  
14  
15  
16  
17  
18  
19  
20  
21  
22  
23  
24  
25  
26  
27  
28  
29  
30  
31  
32  
33  
34  
35  
36  
37  
38  
39  
40  
41  
42  
43  
44  
45  
46  
47  
48  
49  
50  
51  
52  
53  
54  
55  
56  
57  
58  
59  
60

|  |       |
|--|-------|
|  | study |
|  |       |

SCHOLARONE™  
Manuscripts

For peer review only

1  
2  
3  
4  
5  
6  
7  
8  
9  
10  
11  
12  
13  
14  
15  
16  
17  
18  
19  
20  
21  
22  
23  
24  
25  
26  
27  
28  
29  
30  
31  
32  
33  
34  
35  
36  
37  
38  
39  
40  
41  
42  
43  
44  
45  
46  
47  
48  
49  
50  
51  
52  
53  
54  
55  
56  
57  
58  
59  
60

Title page

## Multicentric randomized study of *H. pylori* eradication and pepsinogen testing for prevention of gastric cancer mortality: the GISTAR study

Marcis Leja<sup>1,3</sup>, Jin Young Park<sup>4</sup>, Raul Murillo<sup>4</sup>, Inta Liepniece-Karele<sup>1,2,5</sup>, Sergejs Isajevs<sup>1,2,5</sup>, Ilze Kikuste<sup>1,3</sup>, Dace Rudzite<sup>1,2</sup>, Petra Krike<sup>1</sup>, Sergei Parshutin<sup>1,6</sup>, Inese Polaka<sup>1,6</sup>, Arnis Kirsners<sup>1,6</sup>, Daiga Santare<sup>1,2</sup>, Valdis Folkmanis<sup>1</sup>, Ilva Daugule<sup>1</sup>, Martyn Plummer<sup>7</sup>, Rolando Herrero<sup>4</sup>

- 1- Institute of Clinical and Preventive Medicine & Faculty of Medicine, University of Latvia, Riga, Latvia
- 2- Department of Research, Riga East University hospital, Riga, Latvia
- 3- Digestive Diseases Centre GASTRO, Riga, Latvia
- 4- Prevention and Implementation Group, International Agency for Research on Cancer, Lyon, France
- 5- Academic Histology Laboratory, Riga, Latvia
- 6- Institute of Information Technology, Riga Technical University, Riga, Latvia
- 7- Infection and Cancer Epidemiology Group, International Agency for Research on Cancer, Lyon, France

Contact details of the authors:

**Marcis Leja**, Institute of Clinical and Preventive Medicine & Faculty of Medicine, University of Latvia; Address: 19 Raina boulv., LV1586 Riga, Latvia; e-mail: [cei@latnet.lv](mailto:cei@latnet.lv)

**Jin Young Park**, Prevention and Implementation Group, International Agency for Research on Cancer, Address: 150 Cours Albert Thomas, 69372 Lyon Cedex 08, France; e-mail: [ParkJY@iarc.fr](mailto:ParkJY@iarc.fr)

**Raul Murillo**, Prevention and Implementation Group, International Agency for Research on Cancer, Address: 150 Cours Albert Thomas, 69372 Lyon Cedex 08, France; e-mail: [MurilloR@iarc.fr](mailto:MurilloR@iarc.fr)

**Inta Liepniece-Karele**, Institute of Clinical and Preventive Medicine & Faculty of Medicine, University of Latvia; Address: 19 Raina boulv., LV1586 Riga, Latvia; e-mail: [intaliepniecekarele@inbox.lv](mailto:intaliepniecekarele@inbox.lv)

**Sergejs Isajevs**, Institute of Clinical and Preventive Medicine & Faculty of Medicine, University of Latvia; Address: 19 Raina boulv., LV1586 Riga, Latvia; e-mail: [sergisajevs@inbox.lv](mailto:sergisajevs@inbox.lv)

**Ilze Kikuste**, Institute of Clinical and Preventive Medicine & Faculty of Medicine, University of Latvia; Address: 19 Raina boulv., LV1586 Riga, Latvia; e-mail: [ikikuste@gmail.com](mailto:ikikuste@gmail.com)

1  
2  
3 **Dace Rudzite**, Institute of Clinical and Preventive Medicine & Faculty of Medicine, University  
4 of Latvia; Address: 19 Raina boulv., LV1586 Riga, Latvia; e-mail: [dacerudzite2008@inbox.lv](mailto:dacerudzite2008@inbox.lv)  
5

6 **Petra Krike**, Institute of Clinical and Preventive Medicine & Faculty of Medicine, University of  
7 Latvia; Address: 19 Raina boulv., LV1586 Riga, Latvia; e-mail: [petra.krike@gmail.com](mailto:petra.krike@gmail.com)  
8

9 **Sergei Parshutin**, Institute of Clinical and Preventive Medicine & Faculty of Medicine,  
10 University of Latvia; Address: 19 Raina boulv., LV1586 Riga, Latvia; e-mail:  
11 [Sergejs.Parsutins@rtu.lv](mailto:Sergejs.Parsutins@rtu.lv)  
12

13 **Inese Polaka**, Institute of Clinical and Preventive Medicine & Faculty of Medicine, University  
14 of Latvia; Address: 19 Raina boulv., LV1586 Riga, Latvia; e-mail: [inese.polaka@gmail.com](mailto:inese.polaka@gmail.com)  
15

16 **Arnīs Kirsners**, Institute of Clinical and Preventive Medicine & Faculty of Medicine,  
17 University of Latvia; Address: 19 Raina boulv., LV1586 Riga, Latvia; e-mail:  
18 [arnis.kirsners@rtu.lv](mailto:arnis.kirsners@rtu.lv)  
19

20 **Daiga Santare**, Institute of Clinical and Preventive Medicine & Faculty of Medicine,  
21 University of Latvia; Address: 19 Raina boulv., LV1586 Riga, Latvia; e-mail:  
22 [daiga.santare@inbox.lv](mailto:daiga.santare@inbox.lv)  
23

24 **Valdis Folkmanis**, Institute of Clinical and Preventive Medicine & Faculty of Medicine,  
25 University of Latvia; Address: 19 Raina boulv., LV1586 Riga, Latvia; e-mail:  
26 [valdis.folkmanis@lu.lv](mailto:valdis.folkmanis@lu.lv)  
27

28 **Ilva Daugule**, Institute of Clinical and Preventive Medicine & Faculty of Medicine, University  
29 of Latvia; Address: 19 Raina boulv., LV1586 Riga, Latvia; e-mail: [ilva\\_daugule@hotmail.com](mailto:ilva_daugule@hotmail.com)  
30

31 **Martyn Plummer**, Infection and Cancer Epidemiology Group, International Agency for  
32 Research on Cancer, Address: 150 Cours Albert Thomas, 69372 Lyon Cedex 08, France; e-  
33 mail: [plummerm@iarc.fr](mailto:plummerm@iarc.fr)  
34

35 **Rolando Herrero**, Prevention and Implementation Group, International Agency for Research  
36 on Cancer, Address: 150 Cours Albert Thomas, 69372 Lyon Cedex 08, France; e-mail:  
37 [HerreroR@iarc.fr](mailto:HerreroR@iarc.fr)  
38

39  
40  
41 Corresponding author:  
42

43  
44 **Prof. Marcis Leja**: Institute of Clinical and Preventive Medicine & Faculty of Medicine,  
45 University of Latvia, Riga, Latvia; Address: 19 Raina boulv., Riga LV1586; Tel.: +371-  
46  
47 29497500; Fax: +371-67040248, E-mail: [cei@latnet.lv](mailto:cei@latnet.lv)  
48  
49  
50  
51  
52  
53  
54  
55  
56  
57  
58  
59  
60

**Abstract**

**Introduction:** Population-based eradication of *H.pylori* has been suggested to be cost-effective and is recommended by international guidelines. However, the potential adverse effects of widespread antibiotic use this would entail have not been sufficiently studied. An alternative way to decrease gastric cancer mortality is by non-invasive search for precancerous lesions, in particular gastric atrophy; pepsinogen tests are the best currently available alternative. The primary objective of GISTAR is to determine whether *H.pylori* eradication combined with pepsinogen testing reduces mortality from gastric cancer among 40-64 year old individuals. The secondary objectives include evaluation of *H.pylori* eradication effectiveness in gastric cancer prevention in patients with precancerous lesions and evaluation of the potential adverse events, including effects on microbiome.

**Methods and analysis:** Individuals are recruited from general population (50% men) in areas with high gastric cancer risk in Europe, and undergo detailed lifestyle and medical history questionnaire before being randomly allocated to intervention or control groups. The intervention group undergoes *H. pylori* testing, and is offered eradication therapy if positive; in addition, pepsinogen levels are detected in plasma, and those with decreased levels are referred for upper endoscopy. All participants are offered faecal occult blood testing as an incentive for study participation. Effectiveness of eradication and the spectrum of adverse events are evaluated in study subpopulations. A 35% difference in gastric cancer mortality between the groups is expected to be detectable at 90% power after 15 years if 30,000 individuals are recruited. Biological materials are biobanked for the main and ancillary studies. The study procedure and assumptions will be tested during the pilot phase.

**Ethics and dissemination:** The study was approved by the respective Ethics Committees. An independent Data Safety and Monitoring Board has been established. The findings will be published in peer-reviewed journals and presented at scientific meetings.

**Trial registration number:** NCT02047994



**Strengths and limitations of this study**

- This is currently the only study in Europe addressing population-based eradication of *H. pylori* to prevent gastric cancer as recommended by international guidelines (Maastricht V, Kyoto Global Consensus, EU Joint Action Cancer prevention project CanCon)
- Gastric cancer mortality is used as an end-point which corresponds to the requirements of a cancer screening program
- The strategy of combining population-based *H. pylori* eradication to pepsinogen detection with endoscopic surveillance of participants in whom precancerous lesions have been detected, has not been evaluated before
- The study biorepository with a wide range of biospecimen collection will be a great resource to conduct a number of unique ancillary studies
- However, the large sample size with a long follow-up required to demonstrate a statistical difference in mortality reduction between the two groups is a challenge to the study, with the possibility to increase the sample size even further in case of lower prevalence of *H. pylori* infection, higher number of women in the study group and/or lower acceptance rate for the intervention

**Keywords**

Gastric cancer, prevention, *H. pylori*, eradication, pepsinogen, randomised study

## Introduction

Although gastric cancer remains a major cause of death among malignant diseases, its prevention has been neglected in the Western world for decades.<sup>1</sup> Most countries show declining trends in age-specific gastric cancer incidence, but the total number of cases in the world is not expected to decrease in the next decades due to demographic changes including population growth and aging.<sup>2</sup>

There are considerable geographical variations in the incidence of gastric cancer, with some of the lowest rates seen in North America and Western Europe and the highest in Eastern Asia, Eastern Europe, and South America.<sup>3</sup> According to recent estimates from Europe, high rates have been observed in Central and Eastern European regions including Belarus, Ukraine and the Russian Federation and the Baltic States in Northern Europe, including Latvia. For example, gastric cancer incidence rates are the highest in Belarus (age-standardised rate (ASR) of 42.1/100,000 in men and 17.2/100,000 in women) among 40 European countries.<sup>4,5</sup> These estimates are over three-fold higher than those in France or Switzerland.<sup>4,5</sup> The rates in the majority of the former Soviet Union regions remain high.

Infection with *Helicobacter pylori* (*H. pylori*) is the major etiologic factor responsible for developing gastric cancer.<sup>6,7</sup> It is estimated that 89% of non-cardia gastric cancers are attributable to this infection.<sup>8</sup>

Searching for and eradicating *H. pylori* in healthy asymptomatic adults (the “*search-and-treat*” strategy) has been suggested to be cost-effective by considering the reduction of gastric cancer burden as well as other diseases related to this microorganism.<sup>9-11</sup> The recent global Kyoto conference<sup>12</sup> encouraged the broad application of *search-and-treat*, particularly in high-risk areas. This has been further endorsed by the Maastricht European consensus group.<sup>13</sup> However, due to the limited data available on target groups, feasibility and population impact of the intervention, a working group convened by the International Agency for Research on Cancer (IARC) in 2013 proposed implementation of the strategy via well-designed implementation studies.<sup>1</sup>

*H. pylori* eradication in the general population would lead to high antibiotic consumption, particularly in areas of high prevalence of the infection. Widespread use of the same antibiotics used to treat common diseases, some of them life-threatening, may lead to increased antibiotic resistance of microorganisms other than *H. pylori*.<sup>14</sup> An inverse association observed between the occurrence of gastric and oesophageal cancers may suggest potential opposing effects of the related environmental factors, including *H. pylori*.<sup>15</sup>

1  
2  
3 The potential risks of these effects in community settings were not considered in the above  
4 mentioned cost-effectiveness analyses<sup>9-11</sup>, and knowledge about the potential adverse  
5 effects of *H. pylori* eradication on the gut microbiome is scant.  
6  
7

8  
9 Therefore, the recently published European Guide on Quality Improvement in  
10 Comprehensive Cancer Control emphasised the need for additional clinical studies to clarify  
11 whether and how to implement population-based *H. pylori* screening and eradication  
12 programmes for gastric cancer prevention.<sup>16</sup>  
13  
14

15  
16 In addition to the population-based eradication of *H. pylori*, detection and treatment of  
17 precancerous lesions or early gastric cancer has been proposed as a means to reduce gastric  
18 cancer mortality and some countries in the Western Pacific region have introduced  
19 nationwide gastric cancer screening programmes.<sup>17</sup>20 available non-invasive option to identify individuals with precancerous lesions (in particular,  
21 gastric atrophy)<sup>13</sup> who are at increased risk of gastric cancer. However, a recent meta-  
22 analysis<sup>18</sup> concluded that pepsinogens exhibit only a moderate diagnostic yield in gastric  
23 cancer detection; thus large-scale and well-designed prospective studies are encouraged,  
24 particularly in East, Central and part of Northern Europe and Latin American countries where  
25 gastric cancer burden is relatively high and prevention effort is scarce.  
26  
27  
28  
29  
30  
31

32 Here, we present the design of a clinical trial aimed at investigating the role of *H. pylori*  
33 eradication combined with non-invasive screening for precancerous lesions in the reduction  
34 of gastric cancer mortality in a predominantly Caucasian population in Northern and Eastern  
35 Europe (GISTAR).  
36  
37  
38  
39  
40

#### 41 **Methods and analysis**

42  
43 The **aim** of the study is to search for new intervention strategies to decrease mortality from  
44 gastric cancer in high-risk areas in the Baltic States and Eastern Europe. The main study site  
45 is Latvia, where the estimated ASR (world) per 100,000 for gastric cancer mortality was 16.2  
46 in men and 6.4 in women in 2011. Other potential sites include the Russian Federation with  
47 gastric cancer mortality of 20.8 in men and 8.5 in women, Belarus with 20.2 in men and 7.8  
48 in women, and Ukraine with 17.4 in men and 6.6 in women in 2011.<sup>19</sup>  
49  
50  
51  
52

53 The **primary objective** is to determine if *H. pylori* eradication combined with non-invasive  
54 screening and follow-up of precancerous lesions (atrophic gastritis or higher) reduces  
55 mortality from gastric cancer in a high risk population among 40-64 years old subjects.  
56  
57  
58  
59  
60

1  
2  
3 In addition to the above, **secondary objectives** include analyses of success-rates of *H. pylori*  
4 eradication therapy, resistance rates of *H. pylori* to the key antibiotics used in standard  
5 therapies (in subgroups), potential adverse effects of population-based eradication  
6 (including effects on gut microbiome), optimisation of follow-up strategies as well as search  
7 for new biomarkers, including volatile markers.  
8  
9

10  
11 The **key hypotheses** of the study are: 1) *H. pylori* eradication in middle aged individuals in a  
12 high risk population with endoscopic follow-up of those with evidence of atrophic gastritis  
13 prevents gastric cancer mortality; 2) *H. pylori* eradication is effective in preventing gastric  
14 cancer mortality even after the development of gastric mucosal atrophy; 3) Certain  
15 population subgroups can derive more benefit from *H. pylori* eradication, and therefore  
16 could be targeted if general population eradication is not feasible; 4) A combination of  
17 biomarker screening and upper endoscopy is an appropriate strategy to prevent mortality  
18 from gastric cancer in high incidence areas.  
19  
20

21 The study protocol (version 4.5, revised on 07 September, 2015) was approved by the Ethics  
22 Committee of the International Agency for Research on Cancer (IEC 12-36) as well as the  
23 national Ethics Committees in Latvia; the Ethics Committee of Riga East University Support  
24 Foundation (No.14-A/13) and the Central Medical Ethics Committee (No. 01-29.1/11). The  
25 protocol is registered in the clinicaltrials.gov database (NCT02047994).  
26  
27  
28  
29  
30  
31  
32  
33  
34  
35

### 36 Participants

37 The study aims to enrol men and women at equal proportions at the risk- age (40-64 years at  
38 inclusion) for developing gastric cancer. The recruitment centres are planned in high gastric  
39 cancer risk areas, and predominantly Caucasian origin populations in Europe will be enrolled.  
40 The enrolment has been initiated in three study centers in Latvia: Tukums, Dobele and  
41 Rezekne (Caucasian population), with the potential expansion to other locations; more  
42 genetically diverse populations would be enrolled when the study is expanded to other sites.  
43  
44  
45  
46  
47

48 Recruitment centres will be set up reflecting the study requirements. One recruitment  
49 centre is expected to randomise 3000 study participants, although in locations with smaller  
50 number of inhabitants, fewer than 3000 participants are acceptable. Based on the sample  
51 size calculation (see below) at least 10 centres, each recruiting 3000 study participants  
52 would be required. The study participants will be contacted by phone and invitation mails  
53 through lists that we obtain from the general practitioners (GPs), local primary care medical  
54 centres, and national medical registration databases, as appropriate, in different locations of  
55  
56  
57  
58  
59  
60

1  
2  
3 the potential recruitment centres. We will pay particular attention to keep the gender  
4 balance during recruitment, ensuring at least 50% of the participants are men. To achieve  
5 this, we will invite men in priority by direct telephone calls and invitation mails while accept  
6 participation of women in case they are the family members of the invited men or express  
7 their interest in participating in the study by contacting the study team.  
8  
9

10  
11 All participants must sign an informed consent and they should be in good health at  
12 enrolment, as determined by medical history and physical examination performed by a  
13 study physician.  
14  
15

16  
17 Individuals will be excluded from the trial if they have any of the following: personal history  
18 of gastric cancer prior to enrolment; gastric resections due to benign disease (participants  
19 with ulcer suturing and vagotomy are eligible); *H. pylori* eradication therapy within 12  
20 months prior to inclusion (irrespective of the treatment result); presence of alarm symptoms  
21 for digestive or any other diseases; pathological findings at physical investigation suggestive  
22 of a serious disease requiring immediate management; factors otherwise limiting the  
23 participation according to the protocol; serious psychological conditions/psychiatric disease  
24 limiting the possibilities to understand the requirements for diagnostic and/or medical  
25 interventions; or low expectations on the compliance for the diagnostic work-up, treatment  
26 or follow-up.  
27  
28  
29  
30  
31  
32  
33  
34  
35

### 36 Interventions

37  
38 The general study design is illustrated in Figure.  
39

40  
41 After being provided detailed information on the study by the study personnel and signing a  
42 consent form, individuals with alarm and exclusion symptoms will be identified by a study  
43 physician. The remaining participants will complete a detailed lifestyle and medical history  
44 questionnaire and then will be randomised online into two groups (50% in the intervention  
45 group, 50% in the control group) via central data management system. Randomisation will  
46 be stratified by gender, age group and recruitment site.  
47  
48  
49

50  
51 The intervention group will be tested for pepsinogens (Pg) I and II by a latex-agglutination  
52 test-system (Eiken Chemical Co., Tokyo, Japan). For *H. pylori* infection testing IgG group  
53 antibodies by ELISA (Biohit, Plc., Finland) was initially planned, however based on the  
54 preliminary result from the pilot study which indicated false positivity of serology, <sup>13</sup>C-urea  
55  
56  
57  
58  
59  
60

1  
2  
3 breath test (UBT) is decided to be used for confirmation of the infection. For participants  
4  
5 undergoing endoscopy, histological confirmation will be required for *H. pylori* positivity.  
6

7 The selected cutoff values for pepsinogens characteristic for gastric mucosal atrophy is  
8 based on our previous research;<sup>20</sup> those with pepsinogen Pgl/PgII $\leq$ 2 and Pgl $\leq$ 30 ng/ml will  
9 be referred for upper endoscopy with a detailed biopsy work-up according to the updated  
10 Sydney system.<sup>21</sup> Histological assessment of the biopsies collected from the stomach will be  
11 independently performed by two experienced pathologists; in the case of discrepant results,  
12 the particular slides will be reviewed together to reach consensus.  
13  
14  
15

16  
17 All *H. pylori* positive participants will be re-invited and offered *H. pylori* eradication  
18 treatment. The treatment will be chosen according to the Maastricht guidelines,<sup>13</sup> based on  
19 the resistance patterns to clarithromycin in the particular recruitment site as well as the  
20 clinical effectiveness of the particular regimen whenever data are available. In low resistance  
21 areas (<15-20%) including Latvia<sup>22</sup>, the first choice of eradication treatment will be standard  
22 triple therapy for 10 days: esomeprazole 40 mg, clarithromycin 500 mg, amoxicillin 1000 mg,  
23 each administered twice a day. Second-line treatment will not be offered within the study;  
24 however, study participants requiring it will be referred to their general practitioners with  
25 relevant recommendations. All individuals diagnosed with precancerous lesions during  
26 upper endoscopy will be followed up according to the Management of precancerous  
27 conditions and lesions in the stomach (MAPS) guidelines.<sup>23</sup>  
28  
29  
30  
31  
32  
33  
34  
35

36 The control group will receive standard care and will not be systematically investigated for  
37 *H. pylori* or precancerous lesions. As an incentive for participation, both groups will be  
38 offered faecal occult blood testing by a laboratory-based immunochemical test (FIT) OC-  
39 Sensor (Eiken Chemical Co., Tokyo, Japan), and whenever positive (cut-off at 10  $\mu$ g/g faeces  
40 from a single faecal sample), referred for colonoscopy. Any additional rounds of colorectal  
41 screening will be provided within the respective national colorectal cancer screening  
42 programs.  
43  
44  
45  
46

47 Biological materials including serum, plasma, DNA, as well as stool and biopsies for  
48 microbiota analysis will be collected from different groups of participants for biobanking.  
49 Plasma/serum samples will be processed immediately after being obtained, stored and  
50 transported at -70°C temperature. These materials will provide the unique opportunity to  
51 perform ancillary studies including, but not limited to the following: searching for new  
52 biomarkers; and analysing the impact of wide antibiotic use and presence of precancerous  
53 lesions on gut microbiome.  
54  
55  
56  
57  
58  
59  
60

1  
2  
3 The effectiveness of *H. pylori* eradication will be verified in a subgroup of participants  
4 (n=100-150) from the study centres in Latvia and other centres where resistance patterns  
5 are expected to be different based on the available epidemiological data, by using UBT 6-24  
6 months after the treatment. The treatment adherence as well as presence or absence,  
7 frequency and severity of adverse events potentially related to the eradication therapy will  
8 be actively assessed by telephone interview 45-60 days following the delivery of drugs, and  
9 adverse events will be recorded throughout the study. The susceptibility of *H. pylori* to  
10 commonly used antibiotics in the eradication therapies will be investigated using the pilot  
11 study data from approximately 200 upper endoscopy referrals with evidence of *H. pylori* in  
12 antral biopsies (proportion of individuals with altered biomarker results, and another  
13 proportion with normal biomarkers).

14  
15  
16  
17  
18  
19  
20  
21 The groups will be followed at 5-year intervals by direct or telephone contact or alternative  
22 means of communication until the study end-points are reached. Particular attention will be  
23 given to collect detailed information on potentially *H. pylori* related morbidity and mortality.  
24 Whenever possible, we will invite the participants to the study centres to obtain follow-up  
25 data including demographic information, socio-economic status, physical examination as  
26 well as biological samples (plasma, serum and stool samples and biopsies for microbiome  
27 testing). The new protocol will be developed to update the follow-up data collection. A  
28 record linkage will also be made to the national Cancer and Mortality Registry database to  
29 ascertain cases of and deaths from gastric cancer.

#### 30 31 32 33 34 35 36 37 38 39 Data-capture system and centralized biorepository

40 A centralised multiple-language web-based electronic data-capture system and data  
41 management facilities has been developed for the study. The questionnaire and  
42 investigation data are recorded in a standardised way and the system provides the primary  
43 data source. The system is built using the DotNetNuke content management platform  
44 providing the required conditions for personalized data security. The collected data are  
45 stored in a Microsoft SQL Server database. Initially three languages are being used: English,  
46 Latvian, and Russian. The publicly available information can be viewed at  
47 <https://www.gistar.eu>.

48  
49  
50  
51  
52  
53  
54 A centralized biorepository will be run by the University of Latvia and supervised by IARC.  
55 Pathology services and archiving of formalin-fixed and paraffin-embedded (FFPA) material  
56 will be handled by the Academic Histology Laboratory in Riga, Latvia.  
57  
58  
59  
60

### Trial endpoints and statistical analyses

The primary end-point of the study is mortality difference from gastric cancer between the intervention and control groups at 15 years or when enough cases accumulate to demonstrate a statistically significant difference between the groups. Secondary end-points are the difference in gastric cancer incidence, and all-cause mortality between the two groups. The proportion of gastric cancer cases arising in the subgroup with biomarkers indicating high risk (e.g. low Pgl/PgII ratio and low Pgl levels) will be compared to the group with normal biomarkers at inclusion. Additional estimates will be made on the incidence and stages of cancers comparing participants under endoscopic surveillance and without it as well as comparing participants having undergone *H. pylori* eradication versus those having refused.

The sample size of the study is estimated based on the primary variable of interest, gastric cancer mortality. Estimates of the age- and sex-specific mortality rates from gastric cancer were taken from the GLOBOCAN 2008 estimates for Belarus.<sup>24</sup> Estimates of the number of deaths from gastric cancer were calculated for 5, 10, 15, and 20 years of follow-up. Censoring due to mortality from other causes was taken into account using mortality rates available on the WHO mortality database for Belarus in the years 2007-2009.<sup>19</sup> In addition, a loss to follow-up of 1% per year was included in the calculations to account for migration and other reasons not related to mortality that may prevent the assessment of the primary outcome.

Based on a significance level of 5% and a target power of 90%, with given number of 30,000 participants, 112 deaths from gastric cancer are expected in the control group, and a 35% reduction in gastric cancer mortality is detectable, corresponding to 73 cases in the intervention group at 15 years of follow-up. The study size may need to be increased if lower prevalence of *H. pylori* infection, higher number of women included in the study and/or lower acceptance/compliance to *H. pylori* eradication therapy are observed.

Gastric cancer mortality will be compared between intervention and control groups using a log-rank test. The survival curves will also be compared with use of the Kaplan-Meier life-table method and the Cox proportional-hazards model. The stratified randomisation process should ensure that groups are balanced with respect to age and gender. In addition, a multivariate Cox proportional hazards model will be used to account for confounding factors. The effect of confounding factors on the endpoints will be evaluated using



1  
2  
3 univariate models in the first place. These analyses will be repeated for gastric cancer  
4 incidence difference between the two groups.  
5

6  
7 It is expected that the obtained data will allow running cost-effectiveness ancillary studies  
8 on mass-eradication of *H. pylori* by considering the costs of the adverse effects as well as on  
9 endoscopic surveillance of patients with gastric precancerous lesions in European countries  
10 with a relatively high-risk.  
11

12  
13  
14 The study subject recruitment to the pilot phase has just been completed to test  
15 assumptions defined for the study including acceptability and adherence to the intervention,  
16 and *H. pylori* prevalence, and to test the appropriateness of the chosen tools and  
17 infrastructure for the study. In addition, in this phase the accuracy of biomarkers for  
18 detecting atrophy will be evaluated by comparing different alternatives (e.g. different  
19 manufacturer tests, different cut-off values) against histology.  
20  
21  
22  
23  
24  
25  
26

## 27 Discussion

28  
29 *H. pylori* gastritis has been defined as an infectious disease according to the Kyoto Global  
30 Consensus Conference,<sup>12</sup> and once-per-lifetime eradication treatment with antibiotics seems  
31 to be a rational and cost-effective approach to prevent gastric cancer as well as other *H.*  
32 *pylori*-related diseases, including peptic ulcer and functional dyspepsia.<sup>12 25</sup> In high-risk  
33 countries for gastric cancer this would mean giving antibiotic treatment to the majority of  
34 the population, as is the case for Latvia where *H. pylori* prevalence is around 80%.<sup>26</sup> The risk  
35 of adverse events and increased antibiotic resistance are major concerns; the magnitude of  
36 these risks has not been sufficiently investigated in well-controlled studies, and no country  
37 has implemented a population-based *search-and-treat* strategy for *H. pylori*.<sup>17</sup>  
38  
39

40  
41 Pepsinogens are markers for atrophy of the stomach mucosa;<sup>27</sup> decreased pepsinogen  
42 values have been demonstrated to correlate with increased risk of gastric cancer;<sup>28-30</sup>  
43 furthermore, a combination of pepsinogen testing and *H. pylori* detection has been  
44 suggested to be the best available non-invasive option for gastric cancer risk stratification.<sup>13</sup>  
45

46  
47  
48  
49  
50  
51  
52  
53  
54  
55  
56  
57  
58  
59  
60  
<sup>31</sup> However, the accuracy of pepsinogen tests to identify gastric cancer and even atrophy is  
imperfect.<sup>18</sup>

The current European MAPS guidelines being referred to above, are recommending  
surveillance of patients with precancerous lesions to enable detection of those progressing  
to high-risk lesions or cancer as a strategy of decreasing gastric cancer related mortality.<sup>23</sup>

1  
2  
3 However, there is still a lack of evidence from randomised control trials of combining once-  
4 per-lifetime eradication of *H. pylori* and screening for high-risk conditions with blood  
5 markers such as pepsinogens for reducing gastric cancer mortality. To the best of our  
6 knowledge, this is the first study evaluating the yield of the above combination, i.e. mass-  
7 eradication of *H. pylori* and surveillance of pepsinogen-detected precancerous lesions as a  
8 strategy to reduce gastric cancer mortality.  
9

10  
11  
12 Pepsinogen tests to identify atrophy have demonstrated a wide range of sensitivity in  
13 various studies,<sup>18</sup> indicating that several factors may influence pepsinogen levels in different  
14 populations. The GISTAR study will allow us to investigate the role of *H. pylori* infection and  
15 participants' characteristics on the performance of biomarkers for identifying individuals at  
16 high risk of gastric cancer.  
17  
18

19  
20 A few limitations of the study design should be mentioned. While the randomisation  
21 process should ensure that groups are balanced with respect to age and gender, adjustment  
22 of proportion between genders might be required if a substantially higher proportion of  
23 women or men is recruited into the intervention group. To prevent this, we will make an  
24 extra effort to balance the gender ratio by actively inviting men or women required to  
25 obtain a balance. However we acknowledge that our extra effort to balance the male and  
26 female ratio to ensure sufficient study power to answer the research questions may  
27 influence the generalisability of the study results.  
28  
29

30  
31 The inclusion of colorectal cancer screening in both groups as an incentive may encourage  
32 participation and adherence; however, the general participation may be affected by the fact  
33 that only half of the participants are offered *H. pylori* eradication and screening for  
34 precancerous lesions. Furthermore, we acknowledge that the effect of the intervention  
35 would be influenced by participation rates of the target population and acceptance rate of  
36 the *H. pylori* eradication treatment while participation in and acceptance of endoscopic  
37 examinations would affect the yield of endoscopic follow-up. Another limitation of the study  
38 is the long term follow-up that is required to achieve its objectives. We will make multiple  
39 efforts to assure compliance and retention within the study, including periodic phone calls  
40 and interim visits.  
41  
42

43  
44 As described, the study design and the organization of the field work have taken into  
45 account not only the scientific background but also contextual conditions for a successful  
46 implementation and execution of the trial. If new sites outside Latvia are to be included,  
47  
48  
49  
50  
51

1  
2  
3 study design will be adapted to local conditions for better acceptance and affordability  
4 without compromising the scientific objectives.  
5

6  
7 In conclusion, the study would have major public health implications by providing leads for  
8 prevention activities in populations with elevated rates of gastric cancer, particularly in  
9 Baltic and Eastern European regions where the public health burden from the disease is  
10 substantial.  
11  
12

13  
14  
15  
16 **Figure.** GISTAR general study design  
17

18  
19  
20  
21 **Declarations**  
22

23  
24  
25 **List of abbreviations**  
26

27 FIT – laboratory-based faecal immunochemical test

28 *H. pylori* – *Helicobacter pylori*  
29

30 IARC - International Agency for Research on Cancer

31 FFPA - formalin-fixed and paraffin- embedded material  
32

33 MAPS guidelines - Management of precancerous conditions and lesions in the stomach  
34

35 Pg - pepsinogen  
36

37 UBT - <sup>13</sup>C-urea breath test  
38  
39

40  
41 **Ethics, data safety and dissemination**  
42

43 The Ethics Committee of IARC has approved the study protocol 26/03/2013 and the relevant  
44 protocol updates 02/10/2015. reg. No. IEC 12-36; the Ethics Committee of Riga East  
45 University Hospital Support foundation has approved the protocol 03/10/2013, reg. No. 14-  
46 A/13, and the Central Medical Ethics Committee in Latvia has approved the protocol  
47 09/12/2013, reg. No. 01-29.1/11.  
48  
49

50  
51 All the study participants are required to provide signed consent prior the enrolment.  
52

53 An independent Data Safety and Monitoring Board (DSMB) has been established for the  
54 GISTAR study which involves experts in epidemiology, statistics, clinical trials,  
55  
56  
57  
58  
59  
60

1  
2  
3 gastroenterology and pathology to safeguard the interests of study participants and to  
4 ensure the scientific validity of the study.

5  
6 The findings will be published in peer-reviewed journals and presented at scientific  
7 meetings. We anticipate that study results will provide necessary information to be  
8 considered in further updates of the European and international guidelines for gastric cancer  
9 prevention and *H. pylori* management.  
10  
11  
12

### 13 14 15 **Availability of data and material**

16  
17 Not applicable since the current manuscript does not contain the results of the study.  
18  
19 Development of study-specific biorepository and data capture system has been described  
20 within the main text.  
21

### 22 23 **Competing interests statement**

24  
25 ML is a partner in institutions involved in realization of the project – Digestive Diseases  
26 Centre GASTRO and Academic Histology laboratory. ILK and SI are employees of Academic  
27 Histology laboratory, IK – of Digestive Diseases Centre GASTRO. Otherwise, the authors  
28 declare that they have no competing interests.  
29  
30  
31

### 32 33 **Funding statement**

34  
35 The study has been supported in part by various funding sources in the University of Latvia;  
36 this includes the funding schemes from the European Regional Development Fund (ERDF)  
37 and the National Program for Research in Latvia: Biomedicine 2014-2017. The protocol  
38 development was supported in part by the project of the European Social Fund No.  
39 009/0220/1DP/1.1.1.2.0/09/APIA/VIAA/016 'Multidisciplinary research group for early  
40 cancer detection and cancer prevention'.  
41  
42  
43  
44

### 45 46 **Authors' contributions**

47  
48 ML, JYP, MP, RH have been involved in initial design of the protocol, JYP, SP, ILK, SI, IK, DR,  
49 AK, DS, ID, VF committed to developing particular specialized parts of the protocol; RM, IP,  
50 RH committed to adjusted version of the initial protocol, MP, JYP, RM – to the statistical  
51 evaluations and study sample size estimates, ML, JYP and RM wrote the manuscript, all co-  
52 authors – have participated in improvements to the manuscript and acceptance of it.  
53  
54  
55

### 56 57 **Data Sharing Statement**

1  
2  
3 Data from the pilot study are currently being analysed to be presented in further  
4 publications. These data are available to the principal investigators, study statistician and  
5 DSMB members. The results will be disseminated during international and national  
6 conferences and congresses, published in peer-reviewed papers.  
7  
8  
9

### 10 11 12 **Acknowledgements** 13

14 We acknowledge the contribution of the DSMB members: Iris Lansdorp-Vogelaar, Jack  
15 Cuzick, Fatima Carneiro, Ernst Kuipers, Jose Machado, Peter Malfertheiner, Colm O'Morain  
16 and Mangesh Thorat. Special thanks to Ann Zaubler and Olof Nyren for the valuable input to  
17 the protocol design as well as to Hossam Haick, Lars Engstrand and other members to the  
18 protocol workshop. Particular acknowledgements to administrative-managing staff of the  
19 study - Aiga Rudule, Inga Upmace, Janis Kotlers.  
20  
21  
22  
23

24 The study would not have been possible without the involvement of medical professional  
25 organizations, in particular Digestive Diseases Centre GASTRO, Academic Histology  
26 laboratory, Insights-A as well as municipalities and their healthcare institutions in Cesis,  
27 Aluksne, Ludza, Saldus and Tukums regions of Latvia. We appreciate the support from  
28 industry for the special conditions in supplying with reagents, equipment, medication and/or  
29 professional advice – BIOHIT, Oyi., Eiken Chemical Co., Meridian Bioscience, Inc., KRKA,  
30 Fujifilm Europe.  
31  
32  
33  
34  
35  
36

37 The study has been endorsed by European Helicobacter and Microbiota Study Group  
38 (EHMSG), Healthy Stomach Initiative (HIS) and International Digestive Cancer alliance (IDCA).  
39 Support has been provided by the Riga East University hospital Support Foundation. We  
40 acknowledge also the support from the Ministry of Health of Latvia.  
41  
42  
43  
44  
45  
46  
47  
48  
49  
50  
51  
52  
53  
54  
55  
56  
57  
58  
59  
60

## REFERENCES

1. Herrero R, Parsonnet J, Greenberg ER. Prevention of gastric cancer. *JAMA* 2014;312(12):1197-8.
2. Forman D, Sierra M, S. The current and projected global burden of gastric cancer. In: IARC Helicobacter pylori Working Group Helicobacter pylori Eradication as a Strategy for Preventing Gastric Cancer Lyon, France: International Agency for Research on Cancer (IARC Working Group Reports, No 8); pp 5-15 Available from: <http://www.iarcfr/en/publications/pdfs-online/wrk/wrk8/indexphp2014>.
3. Jemal A, Bray F, Center MM, *et al*. Global cancer statistics. *CA: A Cancer Journal for Clinicians* 2011;61(2):69-90.
4. Ferlay J, Parkin DM, Steliarova-Foucher E. Estimates of cancer incidence and mortality in Europe in 2008. *European journal of cancer (Oxford, England : 1990)* 2010;46(4):765-81.
5. Ferlay J, Steliarova-Foucher E, Lortet-Tieulent J, *et al*. Cancer incidence and mortality patterns in Europe: estimates for 40 countries in 2012. *Eur J Cancer* 2013;49(6):1374-403.
6. IARC Working Group on the Evaluation of Carcinogenic Risks to Humans. Schistosomes, liver flukes and Helicobacter pylori *IARC Monogr Eval Carcinog Risks Hum* 1994;61:1-241.
7. IARC. Monographs on the evaluation of carcinogenic risks to humans, volume 100. A review of carcinogen - Part B: biological agents. Lyon: International Agency for Research on Cancer 2011.
8. Plummer M, Franceschi S, Vignat J, *et al*. Global burden of gastric cancer attributable to Helicobacter pylori. *Int J Cancer* 2015;136(2):487-90.
9. Lansdorp-Vogelaar I, Sharp L. Cost-effectiveness of screening and treating Helicobacter pylori for gastric cancer prevention. *Best Pract Res Clin Gastroenterol* 2013;27(6):933-47.
10. Areia M, Carvalho R, Cadime AT, *et al*. Screening for gastric cancer and surveillance of premalignant lesions: a systematic review of cost-effectiveness studies. *Helicobacter* 2013;18(5):325-37.
11. Moayyedi P. Feasibility and cost effectiveness of population-based H. pylori eradication. In: IARC Helicobacter pylori Working Group Helicobacter pylori Eradication as a Strategy for Preventing Gastric Cancer Lyon, France: International Agency for

- 1  
2  
3 Research on Cancer (IARC Working Group Reports, No 8); pp 174-180 Available  
4 from: <http://www.iarc.fr/en/publications/pdfs-online/wrk/wrk8/index.php2014>.  
5  
6 12. Sugano K, Tack J, Kuipers EJ, *et al.* Kyoto global consensus report on Helicobacter pylori  
7 gastritis. *Gut* 2015;64(9):1353-67.  
8  
9 13. Malfertheiner P, Megraud F, O'Morain CA, *et al.* Management of Helicobacter pylori  
10 infection-the Maastricht V/Florence Consensus Report. *Gut* 2017;66(1):6-30.  
11  
12 14. Malhotra-Kumar S, Lammens C, Coenen S, *et al.* Effect of azithromycin and  
13 clarithromycin therapy on pharyngeal carriage of macrolide-resistant streptococci in  
14 healthy volunteers: a randomised, double-blind, placebo-controlled study. *Lancet*  
15 2007;369(9560):482-90.  
16  
17 15. Derakhshan MH, Arnold M, Brewster DH, *et al.* Worldwide Inverse Association between  
18 Gastric Cancer and Esophageal Adenocarcinoma Suggesting a Common  
19 Environmental Factor Exerting Opposing Effects. *Am J Gastroenterol*  
20 2016;111(2):228-39.  
21  
22 16. Lonnberg S, Sekerija M, Malila N, *et al.* Cancer screening: policy recommendations on  
23 governance, organization and evaluation of cancer screening. In: European Guide on  
24 Quality Improvement in Comprehensive Cancer Control Available from:  
25 <http://www.cancercontro-leu/guide-landing-page/>. Belgium: National Institute of  
26 Public Health, Slovenia, Scientific Institute of Public Health, Belgium 2017:39-76.  
27  
28 17. Bornschein J, Leja M. The global challenge of a healthy stomach. *Best practice & research*  
29 *Clinical gastroenterology* 2014;28(6):949-51.  
30  
31 18. Huang YK, Yu JC, Kang WM, *et al.* Significance of Serum Pepsinogens as a Biomarker for  
32 Gastric Cancer and Atrophic Gastritis Screening: A Systematic Review and Meta-  
33 Analysis. *PLoS One* 2015;10(11):e0142080.  
34  
35 19. IARC. World Health Organization Cancer mortality database, available from [http://www-](http://www-dep.iarc.fr/WHOdb/WHOdb.htm)  
36 [dep.iarc.fr/WHOdb/WHOdb.htm](http://www-dep.iarc.fr/WHOdb/WHOdb.htm). Accessed on 29/02/2016. 2015  
37  
38 20. Leja M, Camargo MC, Polaka I, *et al.* Detection of gastric atrophy by circulating  
39 pepsinogens: A comparison of three assays. *Helicobacter* 2017. *In Press*  
40  
41 21. Dixon MF, Genta RM, Yardley JH, *et al.* Classification and grading of gastritis. The  
42 updated Sydney System. International Workshop on the Histopathology of Gastritis,  
43 Houston 1994. *Am J Surg Pathol* 1996;20(10):1161-81.  
44  
45 22. Kupcinskas J, Leja M. Management of Helicobacter pylori-related diseases in the Baltic  
46 States. *Dig Dis* 2014;32(3):295-301.  
47  
48  
49  
50  
51  
52  
53  
54  
55  
56  
57  
58  
59  
60

- 1  
2  
3 23. Dinis-Ribeiro M, Areia M, de Vries AC, *et al.* Management of precancerous conditions  
4 and lesions in the stomach (MAPS): guideline from the European Society of  
5 Gastrointestinal Endoscopy (ESGE), European Helicobacter Study Group (EHSG),  
6 European Society of Pathology (ESP), and the Sociedade Portuguesa de Endoscopia  
7 Digestiva (SPED). *Endoscopy* 2012;44(1):74-94.  
8  
9  
10  
11 24. Ferlay J, Shin HR, Bray F, *et al.* GLOBOCAN 2008 v1.2, Cancer Incidence and Mortality  
12 Worldwide: IARC CancerBase No. 10 [Internet]. Lyon, France: International Agency  
13 for Research on Cancer Available from: <http://globocan.iarc.fr>, accessed on  
14 22/12/2011 2010  
15  
16  
17 25. Ford AC, Forman D, Hunt RH, *et al.* Helicobacter pylori eradication therapy to prevent  
18 gastric cancer in healthy asymptomatic infected individuals: systematic review and  
19 meta-analysis of randomised controlled trials. *BMJ* 2014;348:g3174.  
20  
21 26. Leja M, Cine E, Rudzite D, *et al.* Prevalence of Helicobacter pylori infection and atrophic  
22 gastritis in Latvia. *Eur J Gastroenterol Hepatol* 2012;24(12):1410-7.  
23  
24 27. Agreus L, Kuipers EJ, Kupcinskas L, *et al.* Rationale in diagnosis and screening of atrophic  
25 gastritis with stomach-specific plasma biomarkers. *Scand J Gastroenterol*  
26 2012;47(2):136-47.  
27  
28 28. Oishi Y, Kiyohara Y, Kubo M, *et al.* The serum pepsinogen test as a predictor of gastric  
29 cancer: the Hisayama study. *Am J Epidemiol* 2006;163(7):629-37.  
30  
31 29. Yanaoka K, Oka M, Mukoubayashi C, *et al.* Cancer high-risk subjects identified by serum  
32 pepsinogen tests: outcomes after 10-year follow-up in asymptomatic middle-aged  
33 males. *Cancer epidemiology, biomarkers & prevention : a publication of the*  
34 *American Association for Cancer Research, cosponsored by the American Society of*  
35 *Preventive Oncology* 2008;17(4):838-45.  
36  
37 30. Kurilovich S, Belkovets A, Reshetnikov O, *et al.* Stomach-specific Biomarkers  
38 (GastroPanel) Can Predict the Development of Gastric Cancer in a Caucasian  
39 Population: A Longitudinal Nested Case-Control Study in Siberia. *Anticancer research*  
40 2016;36(1):247-53.  
41  
42 31. Miki K. Gastric cancer screening by combined assay for serum anti-Helicobacter pylori  
43 IgG antibody and serum pepsinogen levels - "ABC method". *Proc Jpn Acad Ser B Phys*  
44 *Biol Sci* 2011;87(7):405-14.  
45  
46  
47  
48  
49  
50  
51  
52  
53  
54  
55  
56  
57  
58  
59  
60



1  
2  
3  
4  
5  
6  
7  
8  
9  
10  
11  
12  
13  
14  
15  
16  
17  
18  
19  
20  
21  
22  
23  
24  
25  
26  
27  
28  
29  
30  
31  
32  
33  
34  
35  
36  
37  
38  
39  
40  
41  
42  
43  
44  
45  
46  
47  
48  
49  
50  
51  
52  
53  
54  
55  
56  
57  
58  
59  
60

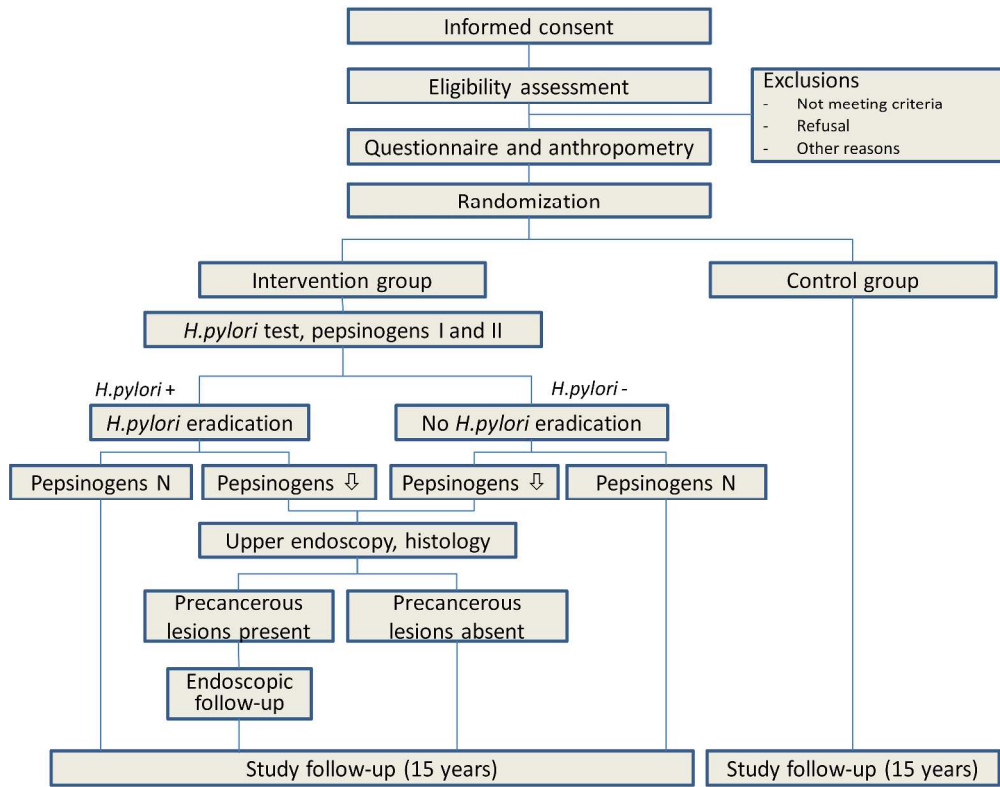

Figure. GISTAR general study design

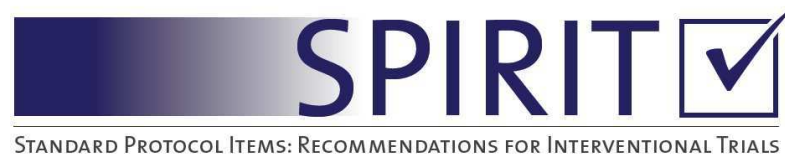

SPIRIT 2013 Checklist: Recommended items to address in a clinical trial protocol and related documents\*

| Section/item                      | Item No | Description                                                                                                                                                                                                                                                                              | Addressed on page number |
|-----------------------------------|---------|------------------------------------------------------------------------------------------------------------------------------------------------------------------------------------------------------------------------------------------------------------------------------------------|--------------------------|
| <b>Administrative information</b> |         |                                                                                                                                                                                                                                                                                          |                          |
| Title                             | 1       | Descriptive title identifying the study design, population, interventions, and, if applicable, trial acronym                                                                                                                                                                             | 1                        |
| Trial registration                | 2a      | Trial identifier and registry name. If not yet registered, name of intended registry                                                                                                                                                                                                     | 3, 7                     |
|                                   | 2b      | All items from the World Health Organization Trial Registration Data Set                                                                                                                                                                                                                 | NA                       |
| Protocol version                  | 3       | Date and version identifier                                                                                                                                                                                                                                                              | 7                        |
| Funding                           | 4       | Sources and types of financial, material, and other support                                                                                                                                                                                                                              | 14, 15                   |
| Roles and responsibilities        | 5a      | Names, affiliations, and roles of protocol contributors                                                                                                                                                                                                                                  | 1, 2                     |
|                                   | 5b      | Name and contact information for the trial sponsor                                                                                                                                                                                                                                       | 2, 14                    |
|                                   | 5c      | Role of study sponsor and funders, if any, in study design; collection, management, analysis, and interpretation of data; writing of the report; and the decision to submit the report for publication, including whether they will have ultimate authority over any of these activities | 14                       |
|                                   | 5d      | Composition, roles, and responsibilities of the coordinating centre, steering committee, endpoint adjudication committee, data management team, and other individuals or groups overseeing the trial, if applicable (see Item 21a for data monitoring committee)                         | 14, 15                   |

1  
2  
3  
4  
5  
6  
7  
8  
9  
10  
11  
12  
13  
14  
15  
16  
17  
18  
19  
20  
21  
22  
23  
24  
25  
26  
27  
28  
29  
30  
31  
32  
33  
34  
35  
36  
37  
38  
39  
40  
41  
42  
43  
44  
45  
46  
47  
48  
49**Introduction**

|                          |    |                                                                                                                                                                                                           |     |
|--------------------------|----|-----------------------------------------------------------------------------------------------------------------------------------------------------------------------------------------------------------|-----|
| Background and rationale | 6a | Description of research question and justification for undertaking the trial, including summary of relevant studies (published and unpublished) examining benefits and harms for each intervention        | 5-7 |
|                          | 6b | Explanation for choice of comparators                                                                                                                                                                     | 5-6 |
| Objectives               | 7  | Specific objectives or hypotheses                                                                                                                                                                         | 6-7 |
| Trial design             | 8  | Description of trial design including type of trial (eg, parallel group, crossover, factorial, single group), allocation ratio, and framework (eg, superiority, equivalence, noninferiority, exploratory) | 8   |

**Methods: Participants, interventions, and outcomes**

|                      |     |                                                                                                                                                                                                                                                                                                                                                                                |        |
|----------------------|-----|--------------------------------------------------------------------------------------------------------------------------------------------------------------------------------------------------------------------------------------------------------------------------------------------------------------------------------------------------------------------------------|--------|
| Study setting        | 9   | Description of study settings (eg, community clinic, academic hospital) and list of countries where data will be collected. Reference to where list of study sites can be obtained                                                                                                                                                                                             | 7-8    |
| Eligibility criteria | 10  | Inclusion and exclusion criteria for participants. If applicable, eligibility criteria for study centres and individuals who will perform the interventions (eg, surgeons, psychotherapists)                                                                                                                                                                                   | 7-8    |
| Interventions        | 11a | Interventions for each group with sufficient detail to allow replication, including how and when they will be administered                                                                                                                                                                                                                                                     | 8-9    |
|                      | 11b | Criteria for discontinuing or modifying allocated interventions for a given trial participant (eg, drug dose change in response to harms, participant request, or improving/worsening disease)                                                                                                                                                                                 | 8-9    |
|                      | 11c | Strategies to improve adherence to intervention protocols, and any procedures for monitoring adherence (eg, drug tablet return, laboratory tests)                                                                                                                                                                                                                              | 7, 11  |
|                      | 11d | Relevant concomitant care and interventions that are permitted or prohibited during the trial                                                                                                                                                                                                                                                                                  | 7      |
| Outcomes             | 12  | Primary, secondary, and other outcomes, including the specific measurement variable (eg, systolic blood pressure), analysis metric (eg, change from baseline, final value, time to event), method of aggregation (eg, median, proportion), and time point for each outcome. Explanation of the clinical relevance of chosen efficacy and harm outcomes is strongly recommended | 10, 11 |
| Participant timeline | 13  | Time schedule of enrolment, interventions (including any run-ins and washouts), assessments, and visits for participants. A schematic diagram is highly recommended (see Figure)                                                                                                                                                                                               | 10     |

|   |             |    |                                                                                                                                                                                       |    |
|---|-------------|----|---------------------------------------------------------------------------------------------------------------------------------------------------------------------------------------|----|
| 1 |             |    |                                                                                                                                                                                       |    |
| 2 |             |    |                                                                                                                                                                                       |    |
| 3 | Sample size | 14 | Estimated number of participants needed to achieve study objectives and how it was determined, including clinical and statistical assumptions supporting any sample size calculations | 10 |
| 4 |             |    |                                                                                                                                                                                       |    |
| 5 |             |    |                                                                                                                                                                                       |    |
| 6 | Recruitment | 15 | Strategies for achieving adequate participant enrolment to reach target sample size                                                                                                   | 7  |
| 7 |             |    |                                                                                                                                                                                       |    |

### 8 **Methods: Assignment of interventions (for controlled trials)**

#### 9 Allocation:

|    |                                  |     |                                                                                                                                                                                                                                                                                                                                                          |      |
|----|----------------------------------|-----|----------------------------------------------------------------------------------------------------------------------------------------------------------------------------------------------------------------------------------------------------------------------------------------------------------------------------------------------------------|------|
| 10 |                                  |     |                                                                                                                                                                                                                                                                                                                                                          |      |
| 11 |                                  |     |                                                                                                                                                                                                                                                                                                                                                          |      |
| 12 | Sequence generation              | 16a | Method of generating the allocation sequence (eg, computer-generated random numbers), and list of any factors for stratification. To reduce predictability of a random sequence, details of any planned restriction (eg, blocking) should be provided in a separate document that is unavailable to those who enrol participants or assign interventions | 7, 9 |
| 13 |                                  |     |                                                                                                                                                                                                                                                                                                                                                          |      |
| 14 |                                  |     |                                                                                                                                                                                                                                                                                                                                                          |      |
| 15 |                                  |     |                                                                                                                                                                                                                                                                                                                                                          |      |
| 16 |                                  |     |                                                                                                                                                                                                                                                                                                                                                          |      |
| 17 |                                  |     |                                                                                                                                                                                                                                                                                                                                                          |      |
| 18 | Allocation concealment mechanism | 16b | Mechanism of implementing the allocation sequence (eg, central telephone; sequentially numbered, opaque, sealed envelopes), describing any steps to conceal the sequence until interventions are assigned                                                                                                                                                | 9    |
| 19 |                                  |     |                                                                                                                                                                                                                                                                                                                                                          |      |
| 20 |                                  |     |                                                                                                                                                                                                                                                                                                                                                          |      |
| 21 |                                  |     |                                                                                                                                                                                                                                                                                                                                                          |      |
| 22 | Implementation                   | 16c | Who will generate the allocation sequence, who will enrol participants, and who will assign participants to interventions                                                                                                                                                                                                                                | 7, 9 |
| 23 |                                  |     |                                                                                                                                                                                                                                                                                                                                                          |      |
| 24 |                                  |     |                                                                                                                                                                                                                                                                                                                                                          |      |
| 25 | Blinding (masking)               | 17a | Who will be blinded after assignment to interventions (eg, trial participants, care providers, outcome assessors, data analysts), and how                                                                                                                                                                                                                | NA   |
| 26 |                                  |     |                                                                                                                                                                                                                                                                                                                                                          |      |
| 27 |                                  |     |                                                                                                                                                                                                                                                                                                                                                          |      |
| 28 |                                  | 17b | If blinded, circumstances under which unblinding is permissible, and procedure for revealing a participant's allocated intervention during the trial                                                                                                                                                                                                     | NA   |
| 29 |                                  |     |                                                                                                                                                                                                                                                                                                                                                          |      |
| 30 |                                  |     |                                                                                                                                                                                                                                                                                                                                                          |      |
| 31 |                                  |     |                                                                                                                                                                                                                                                                                                                                                          |      |

### 32 **Methods: Data collection, management, and analysis**

|    |                         |     |                                                                                                                                                                                                                                                                                                                                                                                                              |       |
|----|-------------------------|-----|--------------------------------------------------------------------------------------------------------------------------------------------------------------------------------------------------------------------------------------------------------------------------------------------------------------------------------------------------------------------------------------------------------------|-------|
| 33 |                         |     |                                                                                                                                                                                                                                                                                                                                                                                                              |       |
| 34 | Data collection methods | 18a | Plans for assessment and collection of outcome, baseline, and other trial data, including any related processes to promote data quality (eg, duplicate measurements, training of assessors) and a description of study instruments (eg, questionnaires, laboratory tests) along with their reliability and validity, if known. Reference to where data collection forms can be found, if not in the protocol | 9, 10 |
| 35 |                         |     |                                                                                                                                                                                                                                                                                                                                                                                                              |       |
| 36 |                         |     |                                                                                                                                                                                                                                                                                                                                                                                                              |       |
| 37 |                         |     |                                                                                                                                                                                                                                                                                                                                                                                                              |       |
| 38 |                         |     |                                                                                                                                                                                                                                                                                                                                                                                                              |       |
| 39 |                         | 18b | Plans to promote participant retention and complete follow-up, including list of any outcome data to be collected for participants who discontinue or deviate from intervention protocols                                                                                                                                                                                                                    | 12    |
| 40 |                         |     |                                                                                                                                                                                                                                                                                                                                                                                                              |       |
| 41 |                         |     |                                                                                                                                                                                                                                                                                                                                                                                                              |       |
| 42 |                         |     |                                                                                                                                                                                                                                                                                                                                                                                                              |       |
| 43 |                         |     |                                                                                                                                                                                                                                                                                                                                                                                                              |       |
| 44 |                         |     |                                                                                                                                                                                                                                                                                                                                                                                                              |       |
| 45 |                         |     |                                                                                                                                                                                                                                                                                                                                                                                                              |       |

1  
2  
3  
4  
5  
6  
7  
8  
9  
10  
11  
12  
13  
14  
15  
16  
17  
18  
19  
20  
21  
22  
23  
24  
25  
26  
27  
28  
29  
30  
31  
32  
33  
34  
35  
36  
37  
38  
39  
40  
41  
42  
43  
44  
45  
46  
47  
48  
49

|                     |     |                                                                                                                                                                                                                                                                   |       |
|---------------------|-----|-------------------------------------------------------------------------------------------------------------------------------------------------------------------------------------------------------------------------------------------------------------------|-------|
| Data management     | 19  | Plans for data entry, coding, security, and storage, including any related processes to promote data quality (eg, double data entry; range checks for data values). Reference to where details of data management procedures can be found, if not in the protocol | 9, 10 |
| Statistical methods | 20a | Statistical methods for analysing primary and secondary outcomes. Reference to where other details of the statistical analysis plan can be found, if not in the protocol                                                                                          | 9     |
|                     | 20b | Methods for any additional analyses (eg, subgroup and adjusted analyses)                                                                                                                                                                                          | 9     |
|                     | 20c | Definition of analysis population relating to protocol non-adherence (eg, as randomised analysis), and any statistical methods to handle missing data (eg, multiple imputation)                                                                                   | NA    |

**Methods: Monitoring**

|                 |     |                                                                                                                                                                                                                                                                                                                                       |    |
|-----------------|-----|---------------------------------------------------------------------------------------------------------------------------------------------------------------------------------------------------------------------------------------------------------------------------------------------------------------------------------------|----|
| Data monitoring | 21a | Composition of data monitoring committee (DMC); summary of its role and reporting structure; statement of whether it is independent from the sponsor and competing interests; and reference to where further details about its charter can be found, if not in the protocol. Alternatively, an explanation of why a DMC is not needed | 13 |
|                 | 21b | Description of any interim analyses and stopping guidelines, including who will have access to these interim results and make the final decision to terminate the trial                                                                                                                                                               | 13 |
| Harms           | 22  | Plans for collecting, assessing, reporting, and managing solicited and spontaneously reported adverse events and other unintended effects of trial interventions or trial conduct                                                                                                                                                     | 13 |
| Auditing        | 23  | Frequency and procedures for auditing trial conduct, if any, and whether the process will be independent from investigators and the sponsor                                                                                                                                                                                           | 13 |

**Ethics and dissemination**

|                          |    |                                                                                                                                                                                                                                  |    |
|--------------------------|----|----------------------------------------------------------------------------------------------------------------------------------------------------------------------------------------------------------------------------------|----|
| Research ethics approval | 24 | Plans for seeking research ethics committee/institutional review board (REC/IRB) approval                                                                                                                                        | 13 |
| Protocol amendments      | 25 | Plans for communicating important protocol modifications (eg, changes to eligibility criteria, outcomes, analyses) to relevant parties (eg, investigators, REC/IRBs, trial participants, trial registries, journals, regulators) | 13 |

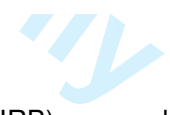

|    |                               |     |                                                                                                                                                                                                                                                                                     |       |
|----|-------------------------------|-----|-------------------------------------------------------------------------------------------------------------------------------------------------------------------------------------------------------------------------------------------------------------------------------------|-------|
| 1  |                               |     |                                                                                                                                                                                                                                                                                     |       |
| 2  |                               |     |                                                                                                                                                                                                                                                                                     |       |
| 3  | Consent or assent             | 26a | Who will obtain informed consent or assent from potential trial participants or authorised surrogates, and how (see Item 32)                                                                                                                                                        | 7     |
| 4  |                               |     |                                                                                                                                                                                                                                                                                     |       |
| 5  |                               |     |                                                                                                                                                                                                                                                                                     |       |
| 6  |                               | 26b | Additional consent provisions for collection and use of participant data and biological specimens in ancillary studies, if applicable                                                                                                                                               | 7, 9  |
| 7  |                               |     |                                                                                                                                                                                                                                                                                     |       |
| 8  |                               |     |                                                                                                                                                                                                                                                                                     |       |
| 9  | Confidentiality               | 27  | How personal information about potential and enrolled participants will be collected, shared, and maintained in order to protect confidentiality before, during, and after the trial                                                                                                | 9     |
| 10 |                               |     |                                                                                                                                                                                                                                                                                     |       |
| 11 |                               |     |                                                                                                                                                                                                                                                                                     |       |
| 12 | Declaration of interests      | 28  | Financial and other competing interests for principal investigators for the overall trial and each study site                                                                                                                                                                       | 14    |
| 13 |                               |     |                                                                                                                                                                                                                                                                                     |       |
| 14 |                               |     |                                                                                                                                                                                                                                                                                     |       |
| 15 | Access to data                | 29  | Statement of who will have access to the final trial dataset, and disclosure of contractual agreements that limit such access for investigators                                                                                                                                     | 13-15 |
| 16 |                               |     |                                                                                                                                                                                                                                                                                     |       |
| 17 |                               |     |                                                                                                                                                                                                                                                                                     |       |
| 18 | Ancillary and post-trial care | 30  | Provisions, if any, for ancillary and post-trial care, and for compensation to those who suffer harm from trial participation                                                                                                                                                       | NA    |
| 19 |                               |     |                                                                                                                                                                                                                                                                                     |       |
| 20 |                               |     |                                                                                                                                                                                                                                                                                     |       |
| 21 | Dissemination policy          | 31a | Plans for investigators and sponsor to communicate trial results to participants, healthcare professionals, the public, and other relevant groups (eg, via publication, reporting in results databases, or other data sharing arrangements), including any publication restrictions | 13    |
| 22 |                               |     |                                                                                                                                                                                                                                                                                     |       |
| 23 |                               |     |                                                                                                                                                                                                                                                                                     |       |
| 24 |                               |     |                                                                                                                                                                                                                                                                                     |       |
| 25 |                               |     |                                                                                                                                                                                                                                                                                     |       |
| 26 |                               | 31b | Authorship eligibility guidelines and any intended use of professional writers                                                                                                                                                                                                      | 13    |
| 27 |                               |     |                                                                                                                                                                                                                                                                                     |       |
| 28 |                               | 31c | Plans, if any, for granting public access to the full protocol, participant-level dataset, and statistical code                                                                                                                                                                     | NA    |
| 29 |                               |     |                                                                                                                                                                                                                                                                                     |       |
| 30 | <b>Appendices</b>             |     |                                                                                                                                                                                                                                                                                     |       |
| 31 |                               |     |                                                                                                                                                                                                                                                                                     |       |
| 32 | Informed consent materials    | 32  | Model consent form and other related documentation given to participants and authorised surrogates                                                                                                                                                                                  | NA    |
| 33 |                               |     |                                                                                                                                                                                                                                                                                     |       |
| 34 |                               |     |                                                                                                                                                                                                                                                                                     |       |
| 35 | Biological specimens          | 33  | Plans for collection, laboratory evaluation, and storage of biological specimens for genetic or molecular analysis in the current trial and for future use in ancillary studies, if applicable                                                                                      | 9, 10 |
| 36 |                               |     |                                                                                                                                                                                                                                                                                     |       |
| 37 |                               |     |                                                                                                                                                                                                                                                                                     |       |

\*It is strongly recommended that this checklist be read in conjunction with the SPIRIT 2013 Explanation & Elaboration for important clarification on the items. Amendments to the protocol should be tracked and dated. The SPIRIT checklist is copyrighted by the SPIRIT Group under the Creative Commons "[Attribution-NonCommercial-NoDerivs 3.0 Unported](https://creativecommons.org/licenses/by-nc-nd/3.0/)" license.
